# Supplementary material for: Off‐Hour Admission and Mortality Risk for 28 Specific Diseases: A Systematic Review and Meta‐Analysis of 251 Cohorts
Source: PubMed Central journal article supplement — J Am Heart Assoc. 2016 Mar 18;5(3):e003102. doi: 10.1161/JAHA.115.003102 (PMC4943279; doi:10.1161/jaha.115.003102), 2016-03-18
Supplement: JAH3-5-e003102-s001.pdf [file JAH3-5-e003102-s001.pdf]

## SUPPLEMENTAL MATERIAL

### **Off-hour Admission and Mortality Risk for 28 Specific Diseases: A Systematic Review and Meta-analysis of 251 cohorts**

Yanfeng Zhou<sup>§</sup>, PhD, Wenzhen Li<sup>§</sup>, PhD, Chulani Herath, PhD, Jiahong Xia, MD, PhD, Bo Hu, MD, PhD, Fujian Song, PhD, Shiyi Cao<sup>\*</sup>, PhD, Zuxun Lu<sup>\*</sup>, MD, PhD

**Supplemental Table S1. Study Characteristics for Cohorts of Off-hour Admission and Mortality Risk.**

| <b>Disease</b>           | <b>First author,<br/>publication year</b> | <b>Study period</b> | <b>Country or<br/>region</b> | <b>Sample<br/>size</b> | <b>NOS<br/>score</b> | <b>Data source</b>     | <b>Admission<br/>time</b>           | <b>Mortality<br/>type</b> | <b>Outcome<br/>Adjusted</b> | <b>OR</b> | <b>LL</b> | <b>UL</b> |
|--------------------------|-------------------------------------------|---------------------|------------------------------|------------------------|----------------------|------------------------|-------------------------------------|---------------------------|-----------------------------|-----------|-----------|-----------|
| myocardial<br>infarction | Bell et al <sup>1</sup>                   | 1988-1997           | North America                | 160220                 | 8                    | administrative<br>data | weekend vs.<br>weekday              | In-hospital               | Adjusted                    | 1.03      | 1.00      | 1.06      |
| myocardial<br>infarction | Henriques et al <sup>2</sup>              | 1994-2000           | Europe and<br>Australia      | 1702                   | 7                    | clinical<br>registries | night vs. day                       | 30-day                    | Unadjusted                  | 2.26      | 1.26      | 4.08      |
| myocardial<br>infarction | Cram et al <sup>3</sup>                   | 1998                | North America                | 42974                  | 8                    | administrative<br>data | weekend vs.<br>weekday              | In-hospital               | Adjusted                    | 1.09      | 1.00      | 1.17      |
| myocardial<br>infarction | Sadeghi et al <sup>4</sup>                | 1997-1999           | North America                | 2036                   | 9                    | clinical<br>registries | weekend and<br>night vs.<br>weekday | 30-day                    | Adjusted                    | 1.99      | 0.74      | 5.37      |
| myocardial<br>infarction | Magid et al <sup>5</sup>                  | 1999-2002           | North America                | 102086                 | 9                    | clinical<br>registries | weekend and<br>night vs.<br>weekday | In-hospital               | Adjusted                    | 1.07      | 1.01      | 1.14      |
| myocardial<br>infarction | Assali et al <sup>6</sup>                 | 2001-2004           | Other countries              | 273                    | 9                    | clinical<br>registries | night vs. day                       | In-hospital               | Unadjusted                  | 5.22      | 1.06      | 25.60     |
| myocardial<br>infarction | Becker et al <sup>7</sup>                 | 1989-1998           | North America                | 922074                 | 6                    | administrative<br>data | weekend vs.<br>weekday              | 30-day                    | Unadjusted                  | 1.01      | 1.00      | 1.02      |
| myocardial<br>infarction | Kostis et al <sup>8</sup><br>(1987-1990)  | 1987-1990           | North America                | 231164                 | 8                    | administrative<br>data | weekend vs.<br>weekday              | In-hospital               | Adjusted                    | 1.03      | 1.01      | 1.06      |
| myocardial<br>infarction | Kostis et al <sup>8</sup><br>(1991-1994)  | 1991-1994           | North America                | 231164                 | 8                    | administrative<br>data | weekend vs.<br>weekday              | In-hospital               | Adjusted                    | 1.03      | 1.00      | 1.05      |
| myocardial<br>infarction | Kostis et al <sup>8</sup><br>(1995-1998)  | 1995-1998           | North America                | 231164                 | 8                    | administrative<br>data | weekend vs.<br>weekday              | In-hospital               | Adjusted                    | 1.02      | 0.99      | 1.04      |

**Supplemental Table S1. Study Characteristics for Cohorts of Off-hour Admission and Mortality Risk (continued).**

| <b>Disease</b>           | <b>First author,<br/>publication year</b> | <b>Study period</b> | <b>Country or<br/>region</b> | <b>Sample<br/>size</b> | <b>NOS<br/>score</b> | <b>Data source</b>     | <b>Admission<br/>time</b>           | <b>Mortality<br/>type</b> | <b>Outcome<br/>Adjusted</b> | <b>OR</b> | <b>LL</b> | <b>UL</b> |
|--------------------------|-------------------------------------------|---------------------|------------------------------|------------------------|----------------------|------------------------|-------------------------------------|---------------------------|-----------------------------|-----------|-----------|-----------|
| myocardial<br>infarction | Kostis et al <sup>8</sup><br>(1999-2002)  | 1999-2002           | North America                | 231164                 | 8                    | administrative<br>data | weekend vs.<br>weekday              | In-hospital               | Adjusted                    | 1.06      | 1.02      | 1.09      |
| myocardial<br>infarction | Ortolani et al <sup>9</sup>               | 2003-2005           | Europe and<br>Australia      | 985                    | 8                    | clinical<br>registries | weekend and<br>night vs.<br>weekday | In-hospital               | Adjusted                    | 1.23      | 0.66      | 2.30      |
| myocardial<br>infarction | Slonka et al <sup>10</sup>                | 1998-2003           | Europe and<br>Australia      | 1778                   | 7                    | clinical<br>registries | weekend and<br>night vs.<br>weekday | In-hospital               | Unadjusted                  | 0.91      | 0.60      | 1.38      |
| myocardial<br>infarction | Srimahachota et al <sup>11</sup>          | 1999-2003           | Other countries              | 256                    | 9                    | clinical<br>registries | weekend and<br>night vs.<br>weekday | In-hospital               | Unadjusted                  | 1.04      | 0.46      | 2.35      |
| myocardial<br>infarction | Berger et al <sup>12</sup>                | 1997-2006           | Europe and<br>Australia      | 12480                  | 9                    | clinical<br>registries | weekend and<br>night vs.<br>weekday | In-hospital               | Adjusted                    | 1.04      | 0.92      | 1.18      |
| myocardial<br>infarction | Evangelista et al <sup>13</sup>           | 2002                | Other countries              | 869                    | 8                    | administrative<br>data | weekend vs.<br>weekday              | In-hospital               | Adjusted                    | 1.71      | 1.08      | 2.71      |
| myocardial<br>infarction | Glaser et al <sup>14</sup>                | 1997-2006           | North America                | 685                    | 9                    | clinical<br>registries | night vs. day                       | In-hospital               | Adjusted                    | 1.17      | 0.50      | 2.72      |
| myocardial<br>infarction | Jneid et al <sup>15</sup>                 | 2000-2005           | North America                | 62814                  | 8                    | clinical<br>registries | weekend and<br>night vs.<br>weekday | In-hospital               | Adjusted                    | 0.99      | 0.93      | 1.06      |

**Supplemental Table S1. Study Characteristics for Cohorts of Off-hour Admission and Mortality Risk (continued).**

| <b>Disease</b>           | <b>First author,<br/>publication year</b> | <b>Study period</b> | <b>Country or<br/>region</b> | <b>Sample<br/>size</b> | <b>NOS<br/>score</b> | <b>Data source</b>     | <b>Admission<br/>time</b>           | <b>Mortality<br/>type</b> | <b>Outcome<br/>Adjusted</b> | <b>OR</b> | <b>LL</b> | <b>UL</b> |
|--------------------------|-------------------------------------------|---------------------|------------------------------|------------------------|----------------------|------------------------|-------------------------------------|---------------------------|-----------------------------|-----------|-----------|-----------|
| myocardial<br>infarction | Kruth et al <sup>16</sup>                 | 1994-2002           | Europe and<br>Australia      | 11516                  | 9                    | clinical<br>registries | weekend and<br>night vs.<br>weekday | In-hospital               | Unadjusted                  | 1.18      | 1.03      | 1.34      |
| myocardial<br>infarction | Becker et al <sup>17</sup>                | 2003-2005           | Europe and<br>Australia      | 1890                   | 8                    | clinical<br>registries | weekend and<br>night vs.<br>weekday | 30-day                    | Unadjusted                  | 1.02      | 0.73      | 1.42      |
| myocardial<br>infarction | Cubeddu et al <sup>18</sup>               | 2003-2007           | North America                | 747                    | 8                    | clinical<br>registries | weekend and<br>night vs.<br>weekday | In-hospital               | Adjusted                    | 3.98      | 1.10      | 14.39     |
| myocardial<br>infarction | Albuquerque et al <sup>19</sup>           | 2004-2008           | Other countries              | 274                    | 7                    | clinical<br>registries | weekend and<br>night vs.<br>weekday | In-hospital               | Unadjusted                  | 2.04      | 0.83      | 5.00      |
| myocardial<br>infarction | Lairez et al <sup>20</sup>                | 2005-2008           | Europe and<br>Australia      | 2266                   | 8                    | clinical<br>registries | weekend and<br>night vs.<br>weekday | In-hospital               | Adjusted                    | 2.81      | 1.56      | 5.06      |
| myocardial<br>infarction | Pollack et al <sup>21</sup>               | 2001-2003           | North America                | 34297                  | 7                    | clinical<br>registries | weekend and<br>night vs.<br>weekday | In-hospital               | Adjusted                    | 0.95      | 0.86      | 1.04      |
| myocardial<br>infarction | Uyarel et al <sup>22</sup>                | 2003-2008           | Other countries              | 2644                   | 8                    | clinical<br>registries | night vs. day                       | In-hospital               | Adjusted                    | 0.98      | 0.70      | 1.37      |
| myocardial<br>infarction | Aylin et al <sup>23</sup>                 | 2005-2006           | Europe and<br>Australia      | 68932                  | 8                    | administrative<br>data | weekend vs.<br>weekday              | In-hospital               | Adjusted                    | 1.08      | 1.03      | 1.13      |

**Supplemental Table S1. Study Characteristics for Cohorts of Off-hour Admission and Mortality Risk (continued).**

| <b>Disease</b>           | <b>First author,<br/>publication year</b> | <b>Study period</b> | <b>Country or<br/>region</b> | <b>Sample<br/>size</b> | <b>NOS<br/>score</b> | <b>Data source</b>     | <b>Admission<br/>time</b>           | <b>Mortality<br/>type</b> | <b>Outcome<br/>Adjusted</b> | <b>OR</b> | <b>LL</b> | <b>UL</b> |
|--------------------------|-------------------------------------------|---------------------|------------------------------|------------------------|----------------------|------------------------|-------------------------------------|---------------------------|-----------------------------|-----------|-----------|-----------|
| myocardial<br>infarction | Cardoso et al <sup>24</sup>               | 2009-2010           | Other countries              | 112                    | 7                    | clinical<br>registries | night vs. day                       | In-hospital               | Unadjusted                  | 2.53      | 0.67      | 9.53      |
| myocardial<br>infarction | Clarke et al <sup>25</sup>                | 2002-2006           | Europe and<br>Australia      | 17910                  | 8                    | administrative<br>data | weekend vs.<br>weekday              | In-hospital               | Adjusted                    | 1.15      | 1.03      | 1.26      |
| myocardial<br>infarction | Gonzalez et al <sup>26</sup>              | 2006-2009           | North America                | 786                    | 7                    | clinical<br>registries | weekend and<br>night vs.<br>weekday | In-hospital               | Unadjusted                  | 0.71      | 0.40      | 1.28      |
| myocardial<br>infarction | Hong et al <sup>27</sup>                  | 2003-2007           | Other countries              | 97466                  | 8                    | administrative<br>data | weekend vs.<br>weekday              | 30-day                    | Adjusted                    | 1.21      | 1.16      | 1.26      |
| myocardial<br>infarction | Maier et al <sup>28</sup>                 | 2004-2007           | Europe and<br>Australia      | 2131                   | 8                    | clinical<br>registries | weekend and<br>night vs.<br>weekday | In-hospital               | Adjusted                    | 2.50      | 1.38      | 4.54      |
| myocardial<br>infarction | Casella et al <sup>29</sup>               | 2004-2006           | Europe and<br>Australia      | 3072                   | 8                    | clinical<br>registries | weekend and<br>night vs.<br>weekday | In-hospital               | Adjusted                    | 0.70      | 0.49      | 1.00      |
| myocardial<br>infarction | Graham et al <sup>30</sup>                | 1999-2006           | North America                | 1664                   | 8                    | clinical<br>registries | Weekend and<br>night                | 30-day                    | Adjusted                    | 1.26      | 0.78      | 2.03      |
| myocardial<br>infarction | Siudak et al <sup>31</sup>                | 2005-2007           | Europe and<br>Australia      | 1650                   | 7                    | clinical<br>registries | weekend and<br>night vs.<br>weekday | In-hospital               | Unadjusted                  | 1.28      | 0.76      | 2.16      |
| myocardial<br>infarction | Al Faleh et al <sup>32</sup>              | 2005-2007           | Other countries              | 1139                   | 9                    | clinical<br>registries | weekend and<br>night vs.<br>weekday | In-hospital               | Unadjusted                  | 1.17      | 0.66      | 2.10      |

**Supplemental Table S1. Study Characteristics for Cohorts of Off-hour Admission and Mortality Risk (continued).**

| <b>Disease</b>           | <b>First author,<br/>publication year</b> | <b>Study period</b> | <b>Country or<br/>region</b> | <b>Sample<br/>size</b> | <b>NOS<br/>score</b> | <b>Data source</b>     | <b>Admission<br/>time</b>           | <b>Mortality<br/>type</b> | <b>Outcome<br/>Adjusted</b> | <b>OR</b> | <b>LL</b> | <b>UL</b> |
|--------------------------|-------------------------------------------|---------------------|------------------------------|------------------------|----------------------|------------------------|-------------------------------------|---------------------------|-----------------------------|-----------|-----------|-----------|
| myocardial<br>infarction | de Boer et al <sup>33</sup>               | 2000-2009           | Europe and<br>Australia      | 4352                   | 8                    | clinical<br>registries | weekend and<br>night vs.<br>weekday | 30-day                    | Adjusted                    | 1.05      | 0.84      | 1.31      |
| myocardial<br>infarction | Hansen et al <sup>34</sup><br>(1997-1999) | 1997-1999           | Europe and<br>Australia      | 92169                  | 8                    | administrative<br>data | weekend vs.<br>weekday              | In-hospital               | Adjusted                    | 1.10      | 1.01      | 1.20      |
| myocardial<br>infarction | Hansen et al <sup>34</sup><br>(2000-2002) | 2000-2002           | Europe and<br>Australia      | 92169                  | 8                    | administrative<br>data | weekend vs.<br>weekday              | In-hospital               | Adjusted                    | 1.04      | 0.95      | 1.13      |
| myocardial<br>infarction | Hansen et al <sup>34</sup><br>(2003-2005) | 2003-2005           | Europe and<br>Australia      | 92169                  | 8                    | administrative<br>data | weekend vs.<br>weekday              | In-hospital               | Adjusted                    | 1.02      | 0.93      | 1.12      |
| myocardial<br>infarction | Hansen et al <sup>34</sup><br>(2006-2009) | 2006-2009           | Europe and<br>Australia      | 92169                  | 8                    | administrative<br>data | weekend vs.<br>weekday              | In-hospital               | Adjusted                    | 1.05      | 0.95      | 1.16      |
| myocardial<br>infarction | Noman et al <sup>35</sup>                 | 2008-2011           | Europe and<br>Australia      | 2571                   | 8                    | clinical<br>registries | weekend and<br>night vs.<br>weekday | In-hospital               | Adjusted                    | 1.33      | 0.73      | 2.41      |
| myocardial<br>infarction | Cubeddu et al <sup>36</sup>               | 2003-2007           | North America                | 2440                   | 8                    | clinical<br>registries | weekend and<br>night vs.<br>weekday | In-hospital               | Adjusted                    | 1.64      | 0.95      | 2.84      |
| myocardial<br>infarction | Gyenes et al <sup>37</sup>                | 1999-2008           | North America                | 6745                   | 7                    | clinical<br>registries | weekend vs.<br>weekday              | In-hospital               | Adjusted                    | 1.52      | 1.15      | 2.01      |
| myocardial<br>infarction | Khera et al <sup>38</sup>                 | 2001-2010           | North America                | 1434579                | 7                    | administrative<br>data | weekend vs.<br>weekday              | In-hospital               | Adjusted                    | 1.11      | 1.07      | 1.16      |

**Supplemental Table S1. Study Characteristics for Cohorts of Off-hour Admission and Mortality Risk (continued).**

| <b>Disease</b>           | <b>First author,<br/>publication year</b>  | <b>Study period</b> | <b>Country or<br/>region</b> | <b>Sample<br/>size</b> | <b>NOS<br/>score</b> | <b>Data source</b>     | <b>Admission<br/>time</b>           | <b>Mortality<br/>type</b> | <b>Outcome<br/>Adjusted</b> | <b>OR</b> | <b>LL</b> | <b>UL</b> |
|--------------------------|--------------------------------------------|---------------------|------------------------------|------------------------|----------------------|------------------------|-------------------------------------|---------------------------|-----------------------------|-----------|-----------|-----------|
| myocardial<br>infarction | O'Neill et al <sup>39</sup>                | 2005-2011           | North America                | 11981                  | 7                    | clinical<br>registries | weekend vs.<br>weekday              | 30-day                    | Adjusted                    | 1.06      | 0.82      | 1.38      |
| myocardial<br>infarction | Rathod et al <sup>40</sup>                 | 2004-2012           | Europe and<br>Australia      | 3347                   | 8                    | clinical<br>registries | weekend and<br>night vs.<br>weekday | 30-day                    | Adjusted                    | 1.04      | 0.78      | 1.39      |
| myocardial<br>infarction | Shavelle et al <sup>41</sup>               | 2007-2009           | North America                | 2565                   | 7                    | clinical<br>registries | night vs. day                       | In-hospital               | Unadjusted                  | 0.94      | 0.62      | 1.43      |
| myocardial<br>infarction | Showkathali et al <sup>42</sup>            | 2009-2011           | Europe and<br>Australia      | 1471                   | 7                    | clinical<br>registries | weekend and<br>night vs.<br>weekday | 30-day                    | Unadjusted                  | 1.10      | 0.60      | 12.00     |
| myocardial<br>infarction | Snelder et al <sup>43</sup><br>(1985-1990) | 1985-1990           | Europe and<br>Australia      | 947                    | 7                    | clinical<br>registries | weekend vs.<br>weekday              | 30-day                    | Adjusted                    | 1.00      | 0.66      | 1.51      |
| myocardial<br>infarction | Snelder et al <sup>43</sup><br>(1990-2000) | 1990-2000           | Europe and<br>Australia      | 1928                   | 7                    | clinical<br>registries | weekend vs.<br>weekday              | 30-day                    | Adjusted                    | 0.70      | 0.51      | 0.97      |
| myocardial<br>infarction | Snelder et al <sup>43</sup><br>(2000-2008) | 2000-2008           | Europe and<br>Australia      | 3945                   | 7                    | clinical<br>registries | weekend vs.<br>weekday              | 30-day                    | Adjusted                    | 1.01      | 0.76      | 1.36      |
| myocardial<br>infarction | Al-Asadi et al <sup>44</sup>               | 2010                | Other countries              | 419                    | 7                    | clinical<br>registries | weekend vs.<br>weekday              | In-hospital               | Adjusted                    | 0.66      | 0.31      | 1.39      |
| myocardial<br>infarction | Nagrebetskyi et al <sup>45</sup>           | 2001-2011           | Europe and<br>Australia      | 633388                 | 7                    | administrative<br>data | weekend vs.<br>weekday              | 30-day                    | Unadjusted                  | 1.01      | 0.99      | 1.03      |
| myocardial<br>infarction | Sterling et al <sup>46</sup>               | 2005-2009           | North America                | 2463                   | 8                    | administrative<br>data | weekend and<br>night vs.<br>weekday | In-hospital               | Adjusted                    | 0.83      | 0.52      | 1.34      |

**Supplemental Table S1. Study Characteristics for Cohorts of Off-hour Admission and Mortality Risk (continued).**

| <b>Disease</b>           | <b>First author,<br/>publication year</b> | <b>Study period</b> | <b>Country or<br/>region</b> | <b>Sample<br/>size</b> | <b>NOS<br/>score</b> | <b>Data source</b>     | <b>Admission<br/>time</b>           | <b>Mortality<br/>type</b> | <b>Outcome<br/>Adjusted</b> | <b>OR</b> | <b>LL</b> | <b>UL</b> |
|--------------------------|-------------------------------------------|---------------------|------------------------------|------------------------|----------------------|------------------------|-------------------------------------|---------------------------|-----------------------------|-----------|-----------|-----------|
| myocardial<br>infarction | Sorita et al <sup>47</sup>                | 1998-2010           | North America                | 6086                   | 9                    | clinical<br>registries | weekend and<br>night vs.<br>weekday | In-hospital               | Adjusted                    | 1.12      | 0.84      | 1.49      |
| myocardial<br>infarction | Isogai et al <sup>48</sup>                | 2010-2012           | Other countries              | 111200                 | 9                    | administrative<br>data | weekend vs.<br>weekday              | In-hospital               | Adjusted                    | 1.14      | 1.08      | 1.21      |
| stroke                   | Cram et al <sup>3</sup>                   | 1998                | North America                | 24565                  | 8                    | administrative<br>data | weekend vs.<br>weekday              | In-hospital               | Adjusted                    | 1.04      | 0.93      | 1.16      |
| stroke                   | Hasegawa et al <sup>49</sup>              | 2000-2001           | Other countries              | 1134                   | 8                    | clinical<br>registries | weekend vs.<br>weekday              | In-hospital               | Adjusted                    | 2.10      | 1.25      | 3.51      |
| stroke                   | Schmulewitz et al <sup>50</sup>           | 2001                | Europe and<br>Australia      | 524                    | 7                    | administrative<br>data | weekend vs.<br>weekday              | In-hospital               | Adjusted                    | 0.78      | 0.51      | 1.18      |
| stroke                   | Saposnik et al <sup>51</sup>              | 2003-2004           | North America                | 26676                  | 7                    | administrative<br>data | weekend vs.<br>weekday              | In-hospital               | Unadjusted                  | 1.14      | 1.02      | 1.27      |
| stroke                   | Turin et al <sup>52</sup>                 | 1988-2003           | Other countries              | 1578                   | 7                    | clinical<br>registries | weekend vs.<br>weekday              | 30-day                    | Unadjusted                  | 1.58      | 0.85      | 2.95      |
| stroke                   | Jauss et al <sup>53</sup>                 | 2003-2006           | Europe and<br>Australia      | 37396                  | 9                    | clinical<br>registries | weekend and<br>night vs.<br>weekday | 7-day                     | Unadjusted                  | 1.00      | 0.86      | 1.16      |
| stroke                   | Reeves et al <sup>54</sup>                | 2003-2007           | North America                | 187669                 | 8                    | clinical<br>registries | weekend and<br>night vs.<br>weekday | In-hospital               | Adjusted                    | 1.09      | 1.03      | 1.15      |



**Supplemental Table S1. Study Characteristics for Cohorts of Off-hour Admission and Mortality Risk (continued).**

| <b>Disease</b> | <b>First author,<br/>publication year</b>                        | <b>Study period</b> | <b>Country or<br/>region</b> | <b>Sample<br/>size</b> | <b>NOS<br/>score</b> | <b>Data source</b>     | <b>Admission<br/>time</b> | <b>Mortality<br/>type</b> | <b>Outcome<br/>Adjusted</b> | <b>OR</b> | <b>LL</b> | <b>UL</b> |
|----------------|------------------------------------------------------------------|---------------------|------------------------------|------------------------|----------------------|------------------------|---------------------------|---------------------------|-----------------------------|-----------|-----------|-----------|
| stroke         | Tung et al <sup>55</sup>                                         | 2005                | Other countries              | 34347                  | 7                    | administrative<br>data | weekend vs.<br>weekday    | 30-day                    | Adjusted                    | 1.22      | 1.06      | 1.40      |
| stroke         | Fang et al <sup>56</sup>                                         | 2003-2008           | North America                | 12432                  | 8                    | clinical<br>registries | weekend vs.<br>weekday    | 7-day                     | Unadjusted                  | 1.17      | 1.00      | 1.37      |
| stroke         | Hoh et al <sup>57</sup>                                          | 2002-2007           | North America                | 599087                 | 8                    | administrative<br>data | weekend vs.<br>weekday    | In-hospital               | Adjusted                    | 1.00      | 0.97      | 1.03      |
| stroke         | Kazley et al <sup>58</sup>                                       | 1998-2006           | North America                | 78657                  | 7                    | administrative<br>data | weekend vs.<br>weekday    | In-hospital               | Adjusted                    | 1.02      | 0.96      | 1.09      |
| stroke         | McKinney et al <sup>59</sup><br>(Comprehensive Stroke<br>Center) | 1996-2007           | North America                | 134441                 | 8                    | administrative<br>data | weekend vs.<br>weekday    | In-hospital               | Adjusted                    | 1.00      | 0.92      | 1.09      |
| stroke         | McKinney et al <sup>59</sup><br>(Non-Stroke Center)              | 1996-2007           | North America                | 134441                 | 8                    | administrative<br>data | weekend vs.<br>weekday    | In-hospital               | Adjusted                    | 1.10      | 1.01      | 1.20      |
| stroke         | McKinney et al <sup>59</sup><br>(Primary Stroke<br>Center)       | 1996-2007           | North America                | 134441                 | 8                    | administrative<br>data | weekend vs.<br>weekday    | In-hospital               | Adjusted                    | 1.07      | 1.00      | 1.14      |
| stroke         | Ogbu et al <sup>60</sup>                                         | 2000-2004           | Europe and<br>Australia      | 82219                  | 7                    | administrative<br>data | weekend vs.<br>weekday    | 7-day                     | Adjusted                    | 1.27      | 1.20      | 1.34      |
| stroke         | Albright et al <sup>61</sup>                                     | 2002-2009           | North America                | 2090                   | 7                    | clinical<br>registries | weekend vs.<br>weekday    | In-hospital               | Unadjusted                  | 0.84      | 0.58      | 1.22      |

**Supplemental Table S1. Study Characteristics for Cohorts of Off-hour Admission and Mortality Risk (continued).**

| <b>Disease</b> | <b>First author,<br/>publication year</b> | <b>Study period</b> | <b>Country or<br/>region</b> | <b>Sample<br/>size</b> | <b>NOS<br/>score</b> | <b>Data source</b>     | <b>Admission<br/>time</b>           | <b>Mortality<br/>type</b> | <b>Outcome<br/>Adjusted</b> | <b>OR</b> | <b>LL</b> | <b>UL</b> |
|----------------|-------------------------------------------|---------------------|------------------------------|------------------------|----------------------|------------------------|-------------------------------------|---------------------------|-----------------------------|-----------|-----------|-----------|
| stroke         | Madej-Fermo et al <sup>62</sup>           | 2005-2010           | North America                | 917                    | 7                    | clinical<br>registries | weekend and<br>night vs.<br>weekday | In-hospital               | Unadjusted                  | 0.81      | 0.54      | 1.23      |
| stroke         | Martinez-martinez et<br>al <sup>63</sup>  | 2008-2009           | Europe and<br>Australia      | 674                    | 8                    | clinical<br>registries | weekend and<br>night vs.<br>weekday | In-hospital               | Adjusted                    | 1.08      | 0.48      | 2.45      |
| stroke         | Niewada et al <sup>64</sup>               | 2004-2005           | Europe and<br>Australia      | 19667                  | 9                    | clinical<br>registries | weekend vs.<br>weekday              | In-hospital               | Adjusted                    | 1.20      | 1.09      | 1.31      |
| stroke         | Palmer et al <sup>65</sup>                | 2009-2010           | Europe and<br>Australia      | 93621                  | 7                    | administrative<br>data | weekend vs.<br>weekday              | 7-day                     | Adjusted                    | 1.18      | 1.12      | 1.24      |
| stroke         | Streifler et al <sup>66</sup>             | 2004-2010           | Other countries              | 4827                   | 9                    | clinical<br>registries | weekend and<br>night vs.<br>weekday | In-hospital               | Unadjusted                  | 1.38      | 1.11      | 1.73      |
| stroke         | Barros et al <sup>67</sup>                | 2006-2008           | Other countries              | 430                    | 6                    | clinical<br>registries | weekend vs.<br>weekday              | 30-day                    | Unadjusted                  | 0.92      | 0.36      | 2.37      |
| stroke         | Bejot et al <sup>68</sup><br>(1985-2003)  | 1985-2003           | Europe and<br>Australia      | 3924                   | 7                    | clinical<br>registries | weekend vs.<br>weekday              | 30-day                    | Adjusted                    | 1.26      | 1.06      | 1.51      |
| stroke         | Bejot et al <sup>68</sup><br>(2004-2010)  | 2004-2010           | Europe and<br>Australia      | 1940                   | 7                    | clinical<br>registries | weekend vs.<br>weekday              | 30-day                    | Adjusted                    | 0.99      | 0.69      | 1.43      |
| stroke         | Concha et al <sup>69</sup>                | 2000-2007           | Europe and<br>Australia      | 36762                  | 7                    | administrative<br>data | weekend vs.<br>weekday              | In-hospital               | Adjusted                    | 1.13      | 1.07      | 1.20      |

**Supplemental Table S1. Study Characteristics for Cohorts of Off-hour Admission and Mortality Risk (continued).**

| <b>Disease</b>        | <b>First author,<br/>publication year</b> | <b>Study period</b> | <b>Country or<br/>region</b> | <b>Sample<br/>size</b> | <b>NOS<br/>score</b> | <b>Data source</b>     | <b>Admission<br/>time</b>           | <b>Mortality<br/>type</b> | <b>Outcome<br/>Adjusted</b> | <b>OR</b> | <b>LL</b> | <b>UL</b> |
|-----------------------|-------------------------------------------|---------------------|------------------------------|------------------------|----------------------|------------------------|-------------------------------------|---------------------------|-----------------------------|-----------|-----------|-----------|
| stroke                | Lee et al <sup>70</sup>                   | 2010–2011           | Other countries              | 10774                  | 8                    | administrative<br>data | weekend and<br>night vs.<br>weekday | 30-day                    | Adjusted                    | 1.58      | 1.06      | 2.35      |
| stroke                | Nishimura et al <sup>71</sup>             | 2011                | Other countries              | 68718                  | 4                    | administrative<br>data | weekend vs.<br>weekday              | 30-day                    | Adjusted                    | 1.11      | 1.04      | 1.18      |
| stroke                | Bray et al <sup>72</sup>                  | 2011-2012           | Europe and<br>Australia      | 56666                  | 7                    | administrative<br>data | weekend vs.<br>weekday              | 30-day                    | Adjusted                    | 0.96      | 0.85      | 1.10      |
| stroke                | Kamitani et al <sup>73</sup>              | 2010-2011           | Other countries              | 35685                  | 7                    | administrative<br>data | weekend and<br>night vs.<br>weekday | In-hospital               | Adjusted                    | 1.06      | 1.00      | 1.13      |
| stroke                | Lusic et al <sup>74</sup>                 | 2005-2010           | North America                | 3868                   | 7                    | clinical<br>registries | weekend vs.<br>weekday              | In-hospital               | Unadjusted                  | 1.06      | 0.89      | 1.26      |
| stroke                | Bell et. al <sup>1</sup>                  | 1988-1997           | North America                | 34136                  | 8                    | administrative<br>data | weekend vs.<br>weekday              | In-hospital               | Adjusted                    | 1.00      | 0.94      | 1.06      |
| stroke                | O'Brien et al <sup>75</sup>               | 1987-2004           | North America                | 821                    | 8                    | administrative<br>data | weekend vs.<br>weekday              | 30-day                    | Adjusted                    | 1.17      | 0.62      | 2.23      |
| pulmonary<br>embolism | Bell et al <sup>1</sup>                   | 1988-1997           | North America                | 11686                  | 8                    | administrative<br>data | weekend vs.<br>weekday              | In-hospital               | Adjusted                    | 1.19      | 1.03      | 1.36      |
| pulmonary<br>embolism | Cram et al <sup>3</sup>                   | 1998                | North America                | 4341                   | 8                    | administrative<br>data | weekend vs.<br>weekday              | In-hospital               | Adjusted                    | 1.42      | 1.15      | 1.76      |
| pulmonary<br>embolism | Schmulewitz et al <sup>50</sup>           | 2001                | Europe and<br>Australia      | 137                    | 7                    | administrative<br>data | weekend vs.<br>weekday              | In-hospital               | Adjusted                    | 0.61      | 0.09      | 2.57      |

**Supplemental Table S1. Study Characteristics for Cohorts of Off-hour Admission and Mortality Risk (continued).**

| <b>Disease</b>     | <b>First author,<br/>publication year</b> | <b>Study period</b> | <b>Country or<br/>region</b> | <b>Sample<br/>size</b> | <b>NOS<br/>score</b> | <b>Data source</b>  | <b>Admission<br/>time</b> | <b>Mortality<br/>type</b> | <b>Outcome<br/>Adjusted</b> | <b>OR</b> | <b>LL</b> | <b>UL</b> |
|--------------------|-------------------------------------------|---------------------|------------------------------|------------------------|----------------------|---------------------|---------------------------|---------------------------|-----------------------------|-----------|-----------|-----------|
| pulmonary embolism | Aujesky et al <sup>76</sup>               | 2000-2002           | North America                | 15531                  | 6                    | administrative data | weekend vs. weekday       | 30-day                    | Adjusted                    | 1.17      | 1.03      | 1.34      |
| pulmonary embolism | Gallerani et al <sup>77</sup>             | 1999-2009           | Europe and Australia         | 26560                  | 6                    | administrative data | weekend vs. weekday       | In-hospital               | Adjusted                    | 1.18      | 1.10      | 1.25      |
| pulmonary embolism | Nanchal et al <sup>78</sup>               | 2000-2008           | North America                | 1143707                | 7                    | administrative data | weekend vs. weekday       | In-hospital               | Adjusted                    | 1.17      | 1.11      | 1.22      |
| pulmonary embolism | Concha et al <sup>69</sup>                | 2000-2007           | Europe and Australia         | 15086                  | 7                    | administrative data | weekend vs. weekday       | In-hospital               | Adjusted                    | 1.64      | 1.34      | 1.99      |
| pulmonary embolism | Giri et al <sup>79</sup>                  | 2011                | North America                | 41210                  | 8                    | administrative data | weekend vs. weekday       | In-hospital               | Adjusted                    | 1.07      | 0.97      | 1.19      |
| renal failure      | Bell et al <sup>1</sup>                   | 1988-1997           | North America                | 3339                   | 8                    | administrative data | weekend vs. weekday       | In-hospital               | Adjusted                    | 1.31      | 1.09      | 1.58      |
| renal failure      | Cram et al <sup>3</sup>                   | 1998                | North America                | 6164                   | 8                    | administrative data | weekend vs. weekday       | In-hospital               | Adjusted                    | 1.07      | 0.93      | 1.24      |
| renal failure      | James et al <sup>80</sup>                 | 2003-2006           | North America                | 963730                 | 7                    | administrative data | weekend vs. weekday       | In-hospital               | Adjusted                    | 1.07      | 1.02      | 1.12      |
| renal failure      | Concha et al <sup>69</sup>                | 2000-2007           | Europe and Australia         | 10657                  | 7                    | administrative data | weekend vs. weekday       | In-hospital               | Adjusted                    | 1.24      | 1.07      | 1.43      |
| renal failure      | Sakhuja et al <sup>81</sup>               | 2005-2009           | North America                | 3278572                | 7                    | administrative data | weekend vs. weekday       | In-hospital               | Adjusted                    | 1.06      | 1.01      | 1.10      |
| renal failure      | Bell et al <sup>1</sup>                   | 1988-1997           | North America                | 6303                   | 8                    | administrative data | weekend vs. weekday       | In-hospital               | Adjusted                    | 1.08      | 0.93      | 1.26      |

**Supplemental Table S1. Study Characteristics for Cohorts of Off-hour Admission and Mortality Risk (continued).**

| <b>Disease</b>                   | <b>First author,<br/>publication year</b> | <b>Study period</b> | <b>Country or<br/>region</b> | <b>Sample<br/>size</b> | <b>NOS<br/>score</b> | <b>Data source</b>     | <b>Admission<br/>time</b>           | <b>Mortality<br/>type</b> | <b>Outcome<br/>Adjusted</b> | <b>OR</b> | <b>LL</b> | <b>UL</b> |
|----------------------------------|-------------------------------------------|---------------------|------------------------------|------------------------|----------------------|------------------------|-------------------------------------|---------------------------|-----------------------------|-----------|-----------|-----------|
| renal failure                    | Bell et al <sup>1</sup>                   | 1988-1997           | North America                | 5196                   | 8                    | administrative<br>data | weekend vs.<br>weekday              | In-hospital               | Adjusted                    | 1.10      | 0.94      | 1.29      |
| renal failure                    | Aylin et al <sup>23</sup>                 | 2005-2006           | Europe and<br>Australia      | 14134                  | 8                    | administrative<br>data | weekend vs.<br>weekday              | In-hospital               | Adjusted                    | 1.45      | 1.32      | 1.6       |
| heart failure                    | Cram et al <sup>3</sup>                   | 1998                | North America                | 55835                  | 8                    | administrative<br>data | weekend vs.<br>weekday              | In-hospital               | Adjusted                    | 1.03      | 0.95      | 1.12      |
| heart failure                    | Fonarow et al <sup>82</sup>               | 2003-2004           | North America                | 48612                  | 7                    | clinical<br>registries | weekend vs.<br>weekday              | In-hospital               | Adjusted                    | 0.99      | 0.84      | 1.17      |
| heart failure                    | Gallerani et al <sup>83</sup>             | 2002-2009           | Europe and<br>Australia      | 9657                   | 7                    | administrative<br>data | weekend vs.<br>weekday              | In-hospital               | Unadjusted                  | 1.39      | 1.22      | 1.58      |
| heart failure                    | Horwich et al <sup>84</sup>               | 2005-2008           | North America                | 81810                  | 7                    | administrative<br>data | weekend vs.<br>weekday              | In-hospital               | Adjusted                    | 1.13      | 1.02      | 1.27      |
| heart failure                    | Concha et al <sup>69</sup>                | 2000-2007           | Europe and<br>Australia      | 59789                  | 7                    | administrative<br>data | weekend vs.<br>weekday              | In-hospital               | Adjusted                    | 1.16      | 1.07      | 1.26      |
| heart failure                    | Hamaguchi et al <sup>85</sup>             | 2004-2005           | Other countries              | 1620                   | 7                    | administrative<br>data | weekend vs.<br>weekday              | In-hospital               | Adjusted                    | 1.13      | 0.63      | 2.00      |
| heart failure                    | Bell et al <sup>1</sup>                   | 1988-1997           | North America                | 141687                 | 8                    | administrative<br>data | weekend vs.<br>weekday              | In-hospital               | Adjusted                    | 1.00      | 0.96      | 1.04      |
| arrhythmia and<br>cardiac arrest | Sprung et al <sup>86</sup>                | 1990-2000           | North America                | 223                    | 5                    | clinical<br>registries | weekend and<br>night vs.<br>weekday | In-hospital               | Adjusted                    | 5.73      | 2.32      | 14.15     |

**Supplemental Table S1. Study Characteristics for Cohorts of Off-hour Admission and Mortality Risk (continued).**

| <b>Disease</b>                | <b>First author,<br/>publication year</b> | <b>Study period</b> | <b>Country or<br/>region</b> | <b>Sample<br/>size</b> | <b>NOS<br/>score</b> | <b>Data source</b>  | <b>Admission<br/>time</b> | <b>Mortality<br/>type</b> | <b>Outcome<br/>Adjusted</b> | <b>OR</b> | <b>LL</b> | <b>UL</b> |
|-------------------------------|-------------------------------------------|---------------------|------------------------------|------------------------|----------------------|---------------------|---------------------------|---------------------------|-----------------------------|-----------|-----------|-----------|
| arrhythmia and cardiac arrest | Cram et al <sup>5</sup>                   | 1998                | North America                | 29995                  | 8                    | administrative data | weekend vs. weekday       | In-hospital               | Adjusted                    | 1.28      | 1.08      | 1.50      |
| arrhythmia and cardiac arrest | Peberdy et al <sup>87</sup>               | 2000-2007           | North America                | 86748                  | 7                    | clinical registries | weekend vs. weekday       | In-hospital               | Unadjusted                  | 1.16      | 1.12      | 1.21      |
| arrhythmia and cardiac arrest | Koike et al <sup>88</sup>                 | 2005-2008           | Other countries              | 173137                 | 7                    | clinical registries | weekends or holidays      | 30-day                    | Unadjusted                  | 1.00      | 0.97      | 1.04      |
| arrhythmia and cardiac arrest | Moler et al <sup>89</sup>                 | 2003-2004           | North America                | 138                    | 7                    | administrative data | weekend vs. weekday       | In-hospital               | Unadjusted                  | 2.61      | 1.20      | 5.69      |
| arrhythmia and cardiac arrest | Qureshi et al <sup>90</sup>               | 2000-2008           | North America                | 1692                   | 7                    | clinical registries | weekend vs. weekday       | In-hospital               | Unadjusted                  | 1.10      | 0.88      | 1.38      |
| arrhythmia and cardiac arrest | Concha et al <sup>69</sup>                | 2000-2007           | Europe and Australia         | 10110                  | 7                    | administrative data | weekend vs. weekday       | In-hospital               | Adjusted                    | 1.14      | 1.04      | 1.25      |
| arrhythmia and cardiac arrest | Bell et al <sup>1</sup>                   | 1988-1997           | North America                | 76907                  | 8                    | administrative data | weekend vs. weekday       | In-hospital               | Adjusted                    | 1.17      | 1.09      | 1.25      |
| arrhythmia and cardiac arrest | Aylin et al <sup>23</sup>                 | 2005-2006           | Europe and Australia         | 2576                   | 8                    | administrative data | weekend vs. weekday       | In-hospital               | Adjusted                    | 1.22      | 1         | 1.48      |
| arrhythmia and cardiac arrest | Aylin et al <sup>23</sup>                 | 2005-2006           | Europe and Australia         | 86134                  | 8                    | administrative data | weekend vs. weekday       | In-hospital               | Adjusted                    | 1.31      | 1.17      | 1.47      |
| intracerebral hemorrhage      | Bell et al <sup>1</sup>                   | 1988-1997           | North America                | 10987                  | 8                    | administrative data | weekend vs. weekday       | In-hospital               | Adjusted                    | 1.01      | 0.93      | 1.11      |
| intracerebral hemorrhage      | Cram et al <sup>3</sup>                   | 1998                | North America                | 6210                   | 8                    | administrative data | weekend vs. weekday       | In-hospital               | Adjusted                    | 1.20      | 1.08      | 1.34      |

**Supplemental Table S1. Study Characteristics for Cohorts of Off-hour Admission and Mortality Risk (continued).**

| <b>Disease</b>               | <b>First author,<br/>publication year</b> | <b>Study period</b> | <b>Country or<br/>region</b> | <b>Sample<br/>size</b> | <b>NOS<br/>score</b> | <b>Data source</b>     | <b>Admission<br/>time</b> | <b>Mortality<br/>type</b> | <b>Outcome<br/>Adjusted</b> | <b>OR</b> | <b>LL</b> | <b>UL</b> |
|------------------------------|-------------------------------------------|---------------------|------------------------------|------------------------|----------------------|------------------------|---------------------------|---------------------------|-----------------------------|-----------|-----------|-----------|
| intracerebral<br>hemorrhage  | Bell et al <sup>1</sup>                   | 1988-1997           | North America                | 3525                   | 8                    | administrative<br>data | weekend vs.<br>weekday    | In-hospital               | Adjusted                    | 1.21      | 0.98      | 1.48      |
| intracerebral<br>hemorrhage  | Crowley et al <sup>91</sup>               | 2004                | North America                | 13821                  | 7                    | administrative<br>data | weekend vs.<br>weekday    | In-hospital               | Adjusted                    | 1.12      | 1.05      | 1.20      |
| intracerebral<br>hemorrhage  | Busl et al <sup>92</sup>                  | 2007-2009           | North America                | 14093                  | 7                    | administrative<br>data | weekend vs.<br>weekday    | In-hospital               | Adjusted                    | 1.19      | 1.02      | 1.38      |
| intracerebral<br>hemorrhage  | Clarke et al <sup>25</sup>                | 2002–2007           | Europe and<br>Australia      | 1781                   | 7                    | administrative<br>data | weekend vs.<br>weekday    | 30-day                    | Adjusted                    | 1.01      | 0.86      | 1.16      |
| intracerebral<br>hemorrhage  | Jiang et al <sup>93</sup>                 | 2008-2009           | Other countries              | 313                    | 7                    | administrative<br>data | weekend vs.<br>weekday    | In-hospital               | Unadjusted                  | 0.79      | 0.43      | 1.47      |
| intracerebral<br>hemorrhage  | McDowell et al <sup>94</sup>              | 2009-2013           | North America                | 13821                  | 5                    | clinical<br>registries | weekend vs.<br>weekday    | In-hospital               | Unadjusted                  | 1.04      | 0.55      | 1.97      |
| gastrointestinal<br>bleeding | Cram et al <sup>3</sup>                   | 1998                | North America                | 9057                   | 8                    | administrative<br>data | weekend vs.<br>weekday    | In-hospital               | Adjusted                    | 1.28      | 1.04      | 1.57      |
| gastrointestinal<br>bleeding | Schmulewitz et al <sup>50</sup>           | 2001                | Europe and<br>Australia      | 584                    | 7                    | administrative<br>data | weekend vs.<br>weekday    | In-hospital               | Adjusted                    | 1.65      | 0.69      | 3.71      |
| gastrointestinal<br>bleeding | Ananthkrishnan et al <sup>95</sup>        | 2004                | North America                | 391119                 | 7                    | administrative<br>data | weekend vs.<br>weekday    | In-hospital               | Adjusted                    | 1.21      | 1.09      | 1.35      |
| gastrointestinal<br>bleeding | Ananthkrishnan et al <sup>95</sup>        | 2004                | North America                | 28820                  | 7                    | administrative<br>data | weekend vs.<br>weekday    | In-hospital               | Adjusted                    | 0.94      | 0.75      | 1.18      |
| gastrointestinal<br>bleeding | Dorn et al <sup>96</sup>                  | 1998-2003           | North America                | 75636                  | 7                    | administrative<br>data | weekend vs.<br>weekday    | In-hospital               | Adjusted                    | 1.09      | 1.00      | 1.18      |

**Supplemental Table S1. Study Characteristics for Cohorts of Off-hour Admission and Mortality Risk (continued).**

| <b>Disease</b>               | <b>First author,<br/>publication year</b> | <b>Study period</b> | <b>Country or<br/>region</b> | <b>Sample<br/>size</b> | <b>NOS<br/>score</b> | <b>Data source</b>     | <b>Admission<br/>time</b> | <b>Mortality<br/>type</b> | <b>Outcome<br/>Adjusted</b> | <b>OR</b> | <b>LL</b> | <b>UL</b> |
|------------------------------|-------------------------------------------|---------------------|------------------------------|------------------------|----------------------|------------------------|---------------------------|---------------------------|-----------------------------|-----------|-----------|-----------|
| gastrointestinal<br>bleeding | Myers et al <sup>97</sup>                 | 1998-2005           | North America                | 36734                  | 7                    | administrative<br>data | weekend vs.<br>weekday    | In-hospital               | Adjusted                    | 1.05      | 0.97      | 1.14      |
| gastrointestinal<br>bleeding | Shaheen et al <sup>98</sup>               | 1993-2005           | North America                | 237412                 | 7                    | administrative<br>data | weekend vs.<br>weekday    | In-hospital               | Adjusted                    | 1.08      | 1.02      | 1.15      |
| gastrointestinal<br>bleeding | Button et al <sup>99</sup>                | 1999-2007           | Europe and<br>Australia      | 24421                  | 7                    | administrative<br>data | weekend vs.<br>weekday    | 30-day                    | Adjusted                    | 1.13      | 1.02      | 1.25      |
| gastrointestinal<br>bleeding | Nahon et al <sup>100</sup>                | 2005-2006           | Europe and<br>Australia      | 3087                   | 7                    | clinical<br>registries | weekend vs.<br>weekday    | In-hospital               | Unadjusted                  | 1.42      | 0.86      | 2.34      |
| gastrointestinal<br>bleeding | Jairath et al <sup>101</sup>              | 2007                | North America                | 6749                   | 7                    | administrative<br>data | weekend vs.<br>weekday    | In-hospital               | Adjusted                    | 0.93      | 0.75      | 1.16      |
| gastrointestinal<br>bleeding | Byun et al <sup>102</sup>                 | 2005-2009           | Other countries              | 294                    | 7                    | clinical<br>registries | weekend vs.<br>weekday    | In-hospital               | Unadjusted                  | 1.06      | 0.57      | 2.00      |
| gastrointestinal<br>bleeding | de Groot et al <sup>103</sup>             | 2009-2011           | Europe and<br>Australia      | 571                    | 7                    | clinical<br>registries | weekend vs.<br>weekday    | 30-day                    | Adjusted                    | 2.68      | 1.07      | 6.72      |
| gastrointestinal<br>bleeding | Abougergi et al <sup>104</sup>            | 2009                | North America                | 199008                 | 7                    | administrative<br>data | weekend vs.<br>weekday    | In-hospital               | Adjusted                    | 1.11      | 0.93      | 1.30      |
| gastrointestinal<br>bleeding | Tufegdzcic et al <sup>105</sup>           | 2002-2012           | Other countries              | 493                    | 7                    | clinical<br>registries | weekend vs.<br>weekday    | In-hospital               | Adjusted                    | 1.20      | 0.50      | 2.87      |
| gastrointestinal<br>bleeding | Wu et al <sup>106</sup>                   | 2009-2011           | Other countries              | 744                    | 7                    | clinical<br>registries | weekends or<br>holidays   | 30-day                    | Unadjusted                  | 0.83      | 0.46      | 1.49      |
| gastrointestinal<br>bleeding | Bell et al <sup>1</sup>                   | 1988-1997           | North America                | 30129                  | 8                    | administrative<br>data | weekend vs.<br>weekday    | In-hospital               | Adjusted                    | 1.08      | 0.96      | 1.20      |



**Supplemental Table S1. Study Characteristics for Cohorts of Off-hour Admission and Mortality Risk (continued).**

| <b>Disease</b>               | <b>First author,<br/>publication year</b> | <b>Study period</b> | <b>Country or<br/>region</b> | <b>Sample<br/>size</b> | <b>NOS<br/>score</b> | <b>Data source</b>     | <b>Admission<br/>time</b> | <b>Mortality<br/>type</b> | <b>Outcome<br/>Adjusted</b> | <b>OR</b> | <b>LL</b> | <b>UL</b> |
|------------------------------|-------------------------------------------|---------------------|------------------------------|------------------------|----------------------|------------------------|---------------------------|---------------------------|-----------------------------|-----------|-----------|-----------|
| gastrointestinal<br>bleeding | Aylin et al <sup>23</sup>                 | 2005-2006           | Europe and<br>Australia      | 57937                  | 8                    | administrative<br>data | weekend vs.<br>weekday    | In-hospital               | Adjusted                    | 1.08      | 1.00      | 1.17      |
| aortic aneurysm              | Bell et al <sup>1</sup>                   | 1988-1997           | North America                | 5454                   | 8                    | administrative<br>data | weekend vs.<br>weekday    | In-hospital               | Adjusted                    | 1.28      | 1.13      | 1.46      |
| aortic aneurysm              | Cram et al <sup>3</sup>                   | 1998                | North America                | 1682                   | 8                    | administrative<br>data | weekend vs.<br>weekday    | In-hospital               | Adjusted                    | 2.13      | 1.77      | 2.58      |
| aortic aneurysm              | Gallerani et al <sup>107</sup>            | 1999-2009           | Europe and<br>Australia      | 4559                   | 7                    | administrative<br>data | weekend vs.<br>weekday    | In-hospital               | Adjusted                    | 1.32      | 1.14      | 1.52      |
| aortic aneurysm              | Gallerani et al <sup>108</sup>            | 2008–2010           | Europe and<br>Australia      | 17319                  | 7                    | administrative<br>data | weekend vs.<br>weekday    | In-hospital               | Adjusted                    | 1.34      | 1.24      | 1.44      |
| aortic aneurysm              | Groves et al <sup>109</sup>               | 2009                | North America                | 5800                   | 7                    | administrative<br>data | weekend vs.<br>weekday    | In-hospital               | Adjusted                    | 1.32      | 1.13      | 1.55      |
| aortic aneurysm              | Groves et al <sup>109</sup>               | 2009                | North America                | 1400                   | 7                    | administrative<br>data | weekend vs.<br>weekday    | In-hospital               | Adjusted                    | 2.55      | 1.77      | 3.68      |
| COPD                         | Schmulewitz et al <sup>50</sup>           | 2001                | Europe and<br>Australia      | 821                    | 7                    | administrative<br>data | weekend vs.<br>weekday    | In-hospital               | Adjusted                    | 0.85      | 0.42      | 1.62      |
| COPD                         | Clarke et al <sup>25</sup>                | 2002–2007           | Europe and<br>Australia      | 30522                  | 7                    | administrative<br>data | weekend vs.<br>weekday    | 30-day                    | Adjusted                    | 0.92      | 0.81      | 1.04      |
| COPD                         | Brimms et al <sup>110</sup>               | 1997-2004           | Europe and<br>Australia      | 9915                   | 7                    | administrative<br>data | weekend vs.<br>weekday    | 7-day                     | Adjusted                    | 1.75      | 0.75      | 4.13      |
| COPD                         | Barba et al <sup>111</sup>                | 2006-2007           | Europe and<br>Australia      | 289077                 | 7                    | administrative<br>data | weekend vs.<br>weekday    | In-hospital               | Adjusted                    | 1.05      | 1.02      | 1.08      |

**Supplemental Table S1. Study Characteristics for Cohorts of Off-hour Admission and Mortality Risk (continued).**

| <b>Disease</b> | <b>First author,<br/>publication year</b> | <b>Study period</b> | <b>Country or<br/>region</b> | <b>Sample<br/>size</b> | <b>NOS<br/>score</b> | <b>Data source</b>     | <b>Admission<br/>time</b> | <b>Mortality<br/>type</b> | <b>Outcome<br/>Adjusted</b> | <b>OR</b> | <b>LL</b> | <b>UL</b> |
|----------------|-------------------------------------------|---------------------|------------------------------|------------------------|----------------------|------------------------|---------------------------|---------------------------|-----------------------------|-----------|-----------|-----------|
| COPD           | Suissa et al <sup>112</sup>               | 1990-2007           | North America                | 323895                 | 7                    | administrative<br>data | weekend vs.<br>weekday    | In-hospital               | Adjusted                    | 1.06      | 1.03      | 1.09      |
| COPD           | Bell et al <sup>1</sup>                   | 1988-1997           | North America                | 11064                  | 8                    | administrative<br>data | weekend vs.<br>weekday    | In-hospital               | Adjusted                    | 1.05      | 0.86      | 1.29      |
| COPD           | Bell et al <sup>1</sup>                   | 1988-1997           | North America                | 6512                   | 8                    | administrative<br>data | weekend vs.<br>weekday    | In-hospital               | Adjusted                    | 1.03      | 0.88      | 1.21      |
| COPD           | Bell et al <sup>1</sup>                   | 1988-1997           | North America                | 52992                  | 8                    | administrative<br>data | weekend vs.<br>weekday    | In-hospital               | Adjusted                    | 1.01      | 0.94      | 1.09      |
| COPD           | Cram et al <sup>3</sup>                   | 1998                | North America                | 28914                  | 8                    | administrative<br>data | weekend vs.<br>weekday    | In-hospital               | Adjusted                    | 1.06      | 0.89      | 1.26      |
| COPD           | Cram et al <sup>3</sup>                   | 1998                | North America                | 1947                   | 8                    | administrative<br>data | weekend vs.<br>weekday    | In-hospital               | Adjusted                    | 1.07      | 0.61      | 1.86      |
| COPD           | Aylin et al <sup>23</sup>                 | 2005-2006           | Europe and<br>Australia      | 106951                 | 8                    | administrative<br>data | weekend vs.<br>weekday    | In-hospital               | Adjusted                    | 1.00      | 0.94      | 1.05      |
| breast cancer  | Bell et al <sup>1</sup>                   | 1988-1997           | North America                | 5192                   | 8                    | administrative<br>data | weekend vs.<br>weekday    | In-hospital               | Adjusted                    | 1.37      | 1.19      | 1.56      |
| breast cancer  | Cram et al <sup>3</sup>                   | 1998                | North America                | 350                    | 8                    | administrative<br>data | weekend vs.<br>weekday    | In-hospital               | Adjusted                    | 2.86      | 1.59      | 5.17      |
| breast cancer  | Concha et al <sup>69</sup>                | 2000-2007           | Europe and<br>Australia      | 1382                   | 7                    | administrative<br>data | weekend vs.<br>weekday    | In-hospital               | Adjusted                    | 1.73      | 1.31      | 2.29      |
| breast cancer  | Aylin et al <sup>23</sup>                 | 2005-2006           | Europe and<br>Australia      | 6382                   | 8                    | administrative<br>data | weekend vs.<br>weekday    | In-hospital               | Adjusted                    | 1.21      | 1.03      | 1.41      |

**Supplemental Table S1. Study Characteristics for Cohorts of Off-hour Admission and Mortality Risk (continued).**

| <b>Disease</b>        | <b>First author,<br/>publication year</b> | <b>Study period</b> | <b>Country or<br/>region</b> | <b>Sample<br/>size</b> | <b>NOS<br/>score</b> | <b>Data source</b>     | <b>Admission<br/>time</b> | <b>Mortality<br/>type</b> | <b>Outcome<br/>Adjusted</b> | <b>OR</b> | <b>LL</b> | <b>UL</b> |
|-----------------------|-------------------------------------------|---------------------|------------------------------|------------------------|----------------------|------------------------|---------------------------|---------------------------|-----------------------------|-----------|-----------|-----------|
| leukemia              | Bell et al <sup>1</sup>                   | 1988-1997           | North America                | 779                    | 7                    | administrative<br>data | weekend vs.<br>weekday    | In-hospital               | Adjusted                    | 1.60      | 1.11      | 2.31      |
| leukemia              | Cram et al <sup>3</sup>                   | 1998                | North America                | 807                    | 7                    | administrative<br>data | weekend vs.<br>weekday    | In-hospital               | Adjusted                    | 1.20      | 0.95      | 1.51      |
| leukemia              | Concha et al <sup>69</sup>                | 2000-2007           | Europe and<br>Australia      | 2401                   | 7                    | administrative<br>data | weekend vs.<br>weekday    | In-hospital               | Adjusted                    | 1.95      | 1.41      | 2.68      |
| leukemia              | Goodman et al <sup>113</sup>              | 1999-2011           | North America                | 1204                   | 7                    | administrative<br>data | weekend vs.<br>weekday    | In-hospital               | Adjusted                    | 1.00      | 0.80      | 1.60      |
| leukemia              | Aylin et al <sup>23</sup>                 | 2005-2006           | Europe and<br>Australia      | 12526                  | 8                    | administrative<br>data | weekend vs.<br>weekday    | In-hospital               | Adjusted                    | 1.65      | 1.42      | 1.92      |
| neonatal<br>mortality | Gould et al <sup>114</sup>                | 1995-1997           | North America                | 1615041                | 8                    | administrative<br>data | weekend vs.<br>weekday    | neonatal                  | Adjusted                    | 1.01      | 0.95      | 1.08      |
| neonatal<br>mortality | Hamilton et al <sup>115</sup>             | 1999-2000           | North America                | 30463                  | 6                    | administrative<br>data | weekend vs.<br>weekday    | neonatal                  | Unadjusted                  | 0.94      | 0.59      | 1.49      |
| neonatal<br>mortality | Hamilton et al <sup>115</sup>             | 1999-2000           | North America                | 16720                  | 6                    | administrative<br>data | weekend vs.<br>weekday    | neonatal                  | Unadjusted                  | 1.39      | 0.89      | 2.15      |
| neonatal<br>mortality | Hamilton et al <sup>115</sup>             | 1999-2000           | North America                | 62535                  | 6                    | administrative<br>data | weekend vs.<br>weekday    | neonatal                  | Unadjusted                  | 1.73      | 1.28      | 2.34      |
| neonatal<br>mortality | Stephansson et al <sup>116</sup>          | 1991-1997           | Europe and<br>Australia      | 694888                 | 7                    | administrative<br>data | weekend vs.<br>weekday    | neonatal                  | Adjusted                    | 1.02      | 0.88      | 1.18      |
| neonatal<br>mortality | Luo et al <sup>117</sup>                  | 1985-1998           | North America                | 3239972                | 8                    | administrative<br>data | weekend vs.<br>weekday    | neonatal                  | Adjusted                    | 0.96      | 0.91      | 1.01      |

**Supplemental Table S1. Study Characteristics for Cohorts of Off-hour Admission and Mortality Risk (continued).**

| <b>Disease</b>        | <b>First author,<br/>publication year</b> | <b>Study period</b> | <b>Country or<br/>region</b> | <b>Sample<br/>size</b> | <b>NOS<br/>score</b> | <b>Data source</b>     | <b>Admission<br/>time</b> | <b>Mortality<br/>type</b> | <b>Outcome<br/>Adjusted</b> | <b>OR</b> | <b>LL</b> | <b>UL</b> |
|-----------------------|-------------------------------------------|---------------------|------------------------------|------------------------|----------------------|------------------------|---------------------------|---------------------------|-----------------------------|-----------|-----------|-----------|
| neonatal<br>mortality | Bell et al <sup>118</sup>                 | 2001-2005           | North America                | 11137                  | 8                    | clinical<br>registries | weekend vs.<br>weekday    | neonatal                  | Adjusted                    | 1.00      | 0.91      | 1.11      |
| neonatal<br>mortality | Gijssen et al <sup>119</sup>              | 2003-2007           | Europe and<br>Australia      | 449714                 | 6                    | clinical<br>registries | weekend vs.<br>weekday    | neonatal                  | Unadjusted                  | 1.16      | 0.98      | 1.39      |
| neonatal<br>mortality | Ibrahimou et al <sup>120</sup>            | 1989-2002           | North America                | 879966                 | 7                    | administrative<br>data | weekend vs.<br>weekday    | neonatal                  | Adjusted                    | 0.90      | 0.80      | 1.00      |
| neonatal<br>mortality | Salihu et al <sup>121</sup>               | 1989-1997           | North America                | 493143                 | 7                    | administrative<br>data | weekend vs.<br>weekday    | neonatal                  | Unadjusted                  | 1.13      | 1.01      | 1.27      |
| pneumonia             | Cram et al <sup>3</sup>                   | 1998                | North America                | 14199                  | 8                    | administrative<br>data | weekend vs.<br>weekday    | In-hospital               | Adjusted                    | 1.00      | 0.91      | 1.10      |
| pneumonia             | Schmulewitz et al <sup>50</sup>           | 2001                | Europe and<br>Australia      | 561                    | 7                    | administrative<br>data | weekend vs.<br>weekday    | In-hospital               | Adjusted                    | 0.50      | 0.27      | 0.88      |
| pneumonia             | Chang et al <sup>122</sup>                | 1997-2008           | Other countries              | 788011                 | 7                    | administrative<br>data | weekend vs.<br>weekday    | 30-day                    | Adjusted                    | 1.03      | 1.01      | 1.05      |
| pneumonia             | Gathara et al <sup>123</sup>              | 2005-2009           | Other countries              | 2901                   | 6                    | clinical<br>registries | weekend vs.<br>weekday    | In-hospital               | Adjusted                    | 1.15      | 0.90      | 1.45      |
| pneumonia             | Bell et al <sup>1</sup>                   | 1988-1997           | North America                | 9387                   | 8                    | administrative<br>data | weekend vs.<br>weekday    | In-hospital               | Adjusted                    | 0.99      | 0.83      | 1.17      |
| pneumonia             | Bell et al <sup>1</sup>                   | 1988-1997           | North America                | 10147                  | 8                    | administrative<br>data | weekend vs.<br>weekday    | In-hospital               | Adjusted                    | 1.12      | 0.97      | 1.28      |
| pneumonia             | Bell et al <sup>1</sup>                   | 1988-1997           | North America                | 98318                  | 8                    | administrative<br>data | weekend vs.<br>weekday    | In-hospital               | Adjusted                    | 1.03      | 0.98      | 1.08      |

**Supplemental Table S1. Study Characteristics for Cohorts of Off-hour Admission and Mortality Risk (continued).**

| <b>Disease</b> | <b>First author,<br/>publication year</b> | <b>Study period</b> | <b>Country or<br/>region</b> | <b>Sample<br/>size</b> | <b>NOS<br/>score</b> | <b>Data source</b>     | <b>Admission<br/>time</b> | <b>Mortality<br/>type</b> | <b>Outcome<br/>Adjusted</b> | <b>OR</b> | <b>LL</b> | <b>UL</b> |
|----------------|-------------------------------------------|---------------------|------------------------------|------------------------|----------------------|------------------------|---------------------------|---------------------------|-----------------------------|-----------|-----------|-----------|
| pneumonia      | Cram et al <sup>5</sup>                   | 1998                | North America                | 58807                  | 8                    | administrative<br>data | weekend vs.<br>weekday    | In-hospital               | Adjusted                    | 0.99      | 0.92      | 1.06      |
| pneumonia      | Aylin et al <sup>23</sup>                 | 2005-2006           | Europe and<br>Australia      | 102465                 | 8                    | administrative<br>data | weekend vs.<br>weekday    | In-hospital               | Adjusted                    | 1.00      | 0.97      | 1.04      |
| hip fracture   | Bell et al <sup>1</sup>                   | 1988-1997           | North America                | 59670                  | 8                    | administrative<br>data | weekend vs.<br>weekday    | In-hospital               | Adjusted                    | 0.97      | 0.90      | 1.04      |
| hip fracture   | Cram et al <sup>3</sup>                   | 1998                | North America                | 22001                  | 8                    | administrative<br>data | weekend vs.<br>weekday    | In-hospital               | Adjusted                    | 1.13      | 0.97      | 1.32      |
| hip fracture   | Foss et al <sup>124</sup>                 | 2002-2004           | Europe and<br>Australia      | 600                    | 7                    | clinical<br>registries | weekend vs.<br>weekday    | 30-day                    | Unadjusted                  | 1.14      | 0.56      | 2.30      |
| hip fracture   | Clarke et al <sup>25</sup>                | 2002-2007           | Europe and<br>Australia      | 4183                   | 7                    | administrative<br>data | weekend vs.<br>weekday    | 30-day                    | Adjusted                    | 0.78      | 0.54      | 1.03      |
| hip fracture   | Daugaard et al <sup>125</sup>             | 2003-2010           | Europe and<br>Australia      | 38020                  | 7                    | clinical<br>registries | weekend vs.<br>weekday    | In-hospital               | Adjusted                    | 1.25      | 1.16      | 1.35      |
| hip fracture   | Thomas et al <sup>126</sup>               | 2009-2013           | Europe and<br>Australia      | 2987                   | 7                    | clinical<br>registries | weekend vs.<br>weekday    | 30-day                    | Adjusted                    | 1.40      | 1.02      | 1.90      |
| trauma         | Laupland et al <sup>127</sup>             | 2002-2006           | North America                | 4000                   | 5                    | administrative<br>data | weekend vs.<br>weekday    | In-hospital               | Adjusted                    | 1.02      | 0.79      | 1.32      |
| trauma         | Carr et al <sup>128</sup>                 | 2006-2008           | North America                | 4382                   | 7                    | administrative<br>data | weekend vs.<br>weekday    | In-hospital               | Adjusted                    | 1.03      | 0.71      | 1.51      |
| trauma         | Carr et al <sup>129</sup>                 | 2004-2008           | North America                | 90461                  | 7                    | administrative<br>data | weekend vs.<br>weekday    | In-hospital               | Adjusted                    | 0.89      | 0.81      | 0.97      |

**Supplemental Table S1. Study Characteristics for Cohorts of Off-hour Admission and Mortality Risk (continued).**

| <b>Disease</b>             | <b>First author,<br/>publication year</b> | <b>Study period</b> | <b>Country or<br/>region</b> | <b>Sample<br/>size</b> | <b>NOS<br/>score</b> | <b>Data source</b>     | <b>Admission<br/>time</b> | <b>Mortality<br/>type</b> | <b>Outcome<br/>Adjusted</b> | <b>OR</b> | <b>LL</b> | <b>UL</b> |
|----------------------------|-------------------------------------------|---------------------|------------------------------|------------------------|----------------------|------------------------|---------------------------|---------------------------|-----------------------------|-----------|-----------|-----------|
| trauma                     | Di Bartolomeo et al <sup>130</sup>        | 2011                | North America                | 1940                   | 7                    | administrative<br>data | night vs. day             | 30-day                    | Adjusted                    | 1.49      | 1.05      | 2.11      |
| trauma                     | Arbabi et al <sup>131</sup>               | 1994-2002           | North America                | 30686                  | 7                    | administrative<br>data | weekend vs.<br>weekday    | In-hospital               | Adjusted                    | 0.92      | 0.83      | 1.01      |
| subarachnoid<br>hemorrhage | Bell et al <sup>1</sup>                   | 1988-1997           | North America                | 6247                   | 8                    | administrative<br>data | weekend vs.<br>weekday    | In-hospital               | Adjusted                    | 1.1       | 0.97      | 1.25      |
| subarachnoid<br>hemorrhage | Cram et al <sup>3</sup>                   | 1998                | North America                | 1918                   | 8                    | administrative<br>data | weekend vs.<br>weekday    | In-hospital               | Adjusted                    | 1.17      | 0.99      | 1.39      |
| subarachnoid<br>hemorrhage | Crowley et al <sup>132</sup>              | 2004                | North America                | 5667                   | 7                    | administrative<br>data | weekend vs.<br>weekday    | 30-day                    | Adjusted                    | 1.03      | 0.89      | 1.19      |
| subarachnoid<br>hemorrhage | Zhang et al <sup>133</sup>                | 2006-2009           | Other countries              | 183                    | 8                    | administrative<br>data | weekend vs.<br>weekday    | In-hospital               | Adjusted                    | 1.77      | 0.83      | 3.77      |
| respiratory<br>neoplasm    | Concha et al <sup>69</sup>                | 2000-2007           | Europe and<br>Australia      | 12543                  | 7                    | administrative<br>data | weekend vs.<br>weekday    | In-hospital               | Adjusted                    | 1.43      | 1.29      | 1.59      |
| respiratory<br>neoplasm    | Bell et al <sup>1</sup>                   | 1988-1997           | North America                | 27013                  | 8                    | administrative<br>data | weekend vs.<br>weekday    | In-hospital               | Adjusted                    | 1.19      | 1.12      | 1.25      |
| respiratory<br>neoplasm    | Cram et al <sup>3</sup>                   | 1998                | North America                | 4784                   | 8                    | administrative<br>data | weekend vs.<br>weekday    | In-hospital               | Adjusted                    | 1.51      | 1.31      | 1.73      |
| respiratory<br>neoplasm    | Bell et al <sup>1</sup>                   | 1988-1997           | North America                | 868                    | 8                    | administrative<br>data | weekend vs.<br>weekday    | In-hospital               | Adjusted                    | 0.96      | 0.67      | 1.39      |
| respiratory<br>neoplasm    | Aylin et al <sup>23</sup>                 | 2005-2006           | Europe and<br>Australia      | 20701                  | 8                    | administrative<br>data | weekend vs.<br>weekday    | In-hospital               | Adjusted                    | 1.34      | 1.29      | 1.44      |

**Supplemental Table S1. Study Characteristics for Cohorts of Off-hour Admission and Mortality Risk (continued).**

| <b>Disease</b>            | <b>First author,<br/>publication year</b> | <b>Study period</b> | <b>Country or<br/>region</b> | <b>Sample<br/>size</b> | <b>NOS<br/>score</b> | <b>Data source</b>     | <b>Admission<br/>time</b>           | <b>Mortality<br/>type</b> | <b>Outcome<br/>Adjusted</b> | <b>OR</b> | <b>LL</b> | <b>UL</b> |
|---------------------------|-------------------------------------------|---------------------|------------------------------|------------------------|----------------------|------------------------|-------------------------------------|---------------------------|-----------------------------|-----------|-----------|-----------|
| colorectal<br>cancer      | Bell et al <sup>1</sup>                   | 1988-1997           | North America                | 11966                  | 8                    | administrative<br>data | weekend vs.<br>weekday              | In-hospital               | Adjusted                    | 1.15      | 1.04      | 1.27      |
| colorectal<br>cancer      | Cram et al <sup>3</sup>                   | 1998                | North America                | 2329                   | 8                    | administrative<br>data | weekend vs.<br>weekday              | In-hospital               | Adjusted                    | 1.80      | 1.44      | 2.24      |
| colorectal<br>cancer      | Bell et al <sup>1</sup>                   | 1988-1997           | North America                | 5018                   | 8                    | administrative<br>data | weekend vs.<br>weekday              | In-hospital               | Adjusted                    | 1.23      | 1.05      | 1.43      |
| colorectal<br>cancer      | Aylin et al <sup>23</sup>                 | 2005-2006           | Europe and<br>Australia      | 8994                   | 8                    | administrative<br>data | weekend vs.<br>weekday              | In-hospital               | Adjusted                    | 1.08      | 0.95      | 1.23      |
| bloodstream<br>infections | Powell et al <sup>134</sup>               | 2008                | North America                | 120609                 | 7                    | administrative<br>data | weekend vs.<br>weekday              | In-hospital               | Adjusted                    | 1.03      | 1.00      | 1.07      |
| bloodstream<br>infections | Laupland et al <sup>135</sup>             | 2000-2008           | North America                | 7722                   | 7                    | administrative<br>data | weekend vs.<br>weekday              | In-hospital               | Adjusted                    | 0.99      | 0.83      | 1.16      |
| bloodstream<br>infections | Laupland et al <sup>136</sup>             | 1998-2005           | North America                | 2108                   | 7                    | administrative<br>data | weekend and<br>night vs.<br>weekday | In-hospital               | Adjusted                    | 0.92      | 0.70      | 1.22      |
| bloodstream<br>infections | Cram et al <sup>3</sup>                   | 1998                | North America                | 25690                  | 8                    | administrative<br>data | weekend vs.<br>weekday              | In-hospital               | Adjusted                    | 1.10      | 1.03      | 1.17      |
| bloodstream<br>infections | Bell et al <sup>1</sup>                   | 1988-1997           | North America                | 18853                  | 8                    | administrative<br>data | weekend vs.<br>weekday              | In-hospital               | Adjusted                    | 0.99      | 0.91      | 1.07      |
| bloodstream<br>infections | Aylin et al <sup>23</sup>                 | 2005-2006           | Europe and<br>Australia      | 16719                  | 8                    | administrative<br>data | weekend vs.<br>weekday              | In-hospital               | Adjusted                    | 1.04      | 0.96      | 1.13      |

**Supplemental Table S1. Study Characteristics for Cohorts of Off-hour Admission and Mortality Risk (continued).**

| <b>Disease</b>                                      | <b>First author,<br/>publication year</b> | <b>Study period</b> | <b>Country or<br/>region</b> | <b>Sample<br/>size</b> | <b>NOS<br/>score</b> | <b>Data source</b>     | <b>Admission<br/>time</b> | <b>Mortality<br/>type</b> | <b>Outcome<br/>Adjusted</b> | <b>OR</b> | <b>LL</b> | <b>UL</b> |
|-----------------------------------------------------|-------------------------------------------|---------------------|------------------------------|------------------------|----------------------|------------------------|---------------------------|---------------------------|-----------------------------|-----------|-----------|-----------|
| traumatic brain<br>injury                           | Schneider et al <sup>137</sup>            | 2006-2008           | North America                | 38675                  | 7                    | administrative<br>data | weekend vs.<br>weekday    | In-hospital               | Adjusted                    | 1.14      | 1.05      | 1.23      |
| traumatic brain<br>injury                           | Cram et al <sup>3</sup>                   | 1998                | North America                | 2510                   | 8                    | administrative<br>data | weekend vs.<br>weekday    | In-hospital               | Adjusted                    | 1.14      | 0.95      | 1.37      |
| traumatic brain<br>injury                           | Bell et al <sup>1</sup>                   | 1988-1997           | North America                | 4668                   | 8                    | administrative<br>data | weekend vs.<br>weekday    | In-hospital               | Adjusted                    | 1.16      | 1.00      | 1.35      |
| malignant<br>neoplasm of<br>genitourinary<br>organs | Cram et al <sup>3</sup>                   | 1998                | North America                | 390                    | 8                    | administrative<br>data | weekend vs.<br>weekday    | In-hospital               | Adjusted                    | 3.12      | 1.99      | 4.00      |
| malignant<br>neoplasm of<br>genitourinary<br>organs | Bell et al <sup>1</sup>                   | 1988-1997           | North America                | 2527                   | 8                    | administrative<br>data | weekend vs.<br>weekday    | In-hospital               | Adjusted                    | 1.22      | 0.99      | 1.49      |
| malignant<br>neoplasm of<br>genitourinary<br>organs | Bell et al <sup>1</sup>                   | 1988-1997           | North America                | 4218                   | 8                    | administrative<br>data | weekend vs.<br>weekday    | In-hospital               | Adjusted                    | 0.91      | 0.74      | 1.11      |
| malignant<br>neoplasm of<br>genitourinary<br>organs | Bell et al <sup>1</sup>                   | 1988-1997           | North America                | 2448                   | 8                    | administrative<br>data | weekend vs.<br>weekday    | In-hospital               | Adjusted                    | 0.90      | 0.71      | 1.34      |



**Supplemental Table S1. Study Characteristics for Cohorts of Off-hour Admission and Mortality Risk (continued).**

| <b>Disease</b>                                      | <b>First author,<br/>publication year</b> | <b>Study period</b> | <b>Country or<br/>region</b> | <b>Sample<br/>size</b> | <b>NOS<br/>score</b> | <b>Data source</b>     | <b>Admission<br/>time</b> | <b>Mortality<br/>type</b> | <b>Outcome<br/>Adjusted</b> | <b>OR</b> | <b>LL</b> | <b>UL</b> |
|-----------------------------------------------------|-------------------------------------------|---------------------|------------------------------|------------------------|----------------------|------------------------|---------------------------|---------------------------|-----------------------------|-----------|-----------|-----------|
| malignant<br>neoplasm of<br>genitourinary<br>organs | Schmid et al <sup>138</sup>               | 1998-2009           | North America                | 534011                 | 7                    | administrative<br>data | weekend vs.<br>weekday    | In-hospital               | Adjusted                    | 1.20      | 1.14      | 1.27      |
| malignant<br>neoplasm of<br>genitourinary<br>organs | Bell et al <sup>1</sup>                   | 1988-1997           | North America                | 8369                   | 7                    | administrative<br>data | weekend vs.<br>weekday    | In-hospital               | Adjusted                    | 1.21      | 1.06      | 1.37      |
| malignant<br>neoplasm of<br>genitourinary<br>organs | Aylin et al <sup>23</sup>                 | 2005-2006           | Europe and<br>Australia      | 6935                   | 8                    | administrative<br>data | weekend vs.<br>weekday    | In-hospital               | Adjusted                    | 1.42      | 1.22      | 1.64      |
| diverticulitis                                      | Bell et al <sup>1</sup>                   | 1988-1997           | North America                | 24278                  | 8                    | administrative<br>data | weekend vs.<br>weekday    | In-hospital               | Adjusted                    | 1.08      | 0.86      | 1.34      |
| diverticulitis                                      | Worni et al <sup>139</sup>                | 2002-2008           | North America                | 31832                  | 7                    | administrative<br>data | weekend vs.<br>weekday    | In-hospital               | Adjusted                    | 1.00      | 0.86      | 1.16      |
| diverticulitis                                      | Cram et al <sup>3</sup>                   | 1998                | North America                | 11850                  | 8                    | administrative<br>data | weekend vs.<br>weekday    | In-hospital               | Adjusted                    | 1.14      | 0.84      | 1.54      |
| peptic ulcer                                        | Bell et al <sup>1</sup>                   | 1988-1997           | North America                | 19214                  | 8                    | administrative<br>data | weekend vs.<br>weekday    | In-hospital               | Adjusted                    | 0.98      | 0.82      | 1.17      |
| peptic ulcer                                        | Bell et al <sup>1</sup>                   | 1988-1997           | North America                | 13380                  | 8                    | administrative<br>data | weekend vs.<br>weekday    | In-hospital               | Adjusted                    | 1.01      | 0.81      | 1.25      |

**Supplemental Table S1. Study Characteristics for Cohorts of Off-hour Admission and Mortality Risk (continued).**

| <b>Disease</b>          | <b>First author,<br/>publication year</b> | <b>Study period</b> | <b>Country or<br/>region</b> | <b>Sample<br/>size</b> | <b>NOS<br/>score</b> | <b>Data source</b>     | <b>Admission<br/>time</b> | <b>Mortality<br/>type</b> | <b>Outcome<br/>Adjusted</b> | <b>OR</b> | <b>LL</b> | <b>UL</b> |
|-------------------------|-------------------------------------------|---------------------|------------------------------|------------------------|----------------------|------------------------|---------------------------|---------------------------|-----------------------------|-----------|-----------|-----------|
| peptic ulcer            | Cram et al <sup>3</sup>                   | 1998                | North America                | 7434                   | 8                    | administrative<br>data | weekend vs.<br>weekday    | In-hospital               | Adjusted                    | 0.80      | 0.58      | 1.12      |
| peptic ulcer            | Cram et al <sup>3</sup>                   | 1998                | North America                | 6059                   | 8                    | administrative<br>data | weekend vs.<br>weekday    | In-hospital               | Adjusted                    | 1.64      | 1.22      | 2.20      |
| aspiration<br>pneumonia | Bell et al <sup>1</sup>                   | 1988-1997           | North America                | 8250                   | 8                    | administrative<br>data | weekend vs.<br>weekday    | In-hospital               | Adjusted                    | 1.10      | 1         | 1.20      |
| aspiration<br>pneumonia | Cram et al <sup>3</sup>                   | 1998                | North America                | 12481                  | 8                    | administrative<br>data | weekend vs.<br>weekday    | In-hospital               | Adjusted                    | 0.93      | 0.83      | 1.04      |
| aspiration<br>pneumonia | Aylin et al <sup>23</sup>                 | 2005-2006           | Europe and<br>Australia      | 6233                   | 8                    | administrative<br>data | weekend vs.<br>weekday    | In-hospital               | Adjusted                    | 0.97      | 0.86      | 1.10      |
| pancreatic<br>cancer    | Bell et al <sup>1</sup>                   | 1988-1997           | North America                | 5723                   | 8                    | administrative<br>data | weekend vs.<br>weekday    | In-hospital               | Adjusted                    | 1.19      | 1.05      | 1.36      |
| pancreatic<br>cancer    | Cram et al <sup>3</sup>                   | 1998                | North America                | 969                    | 8                    | administrative<br>data | weekend vs.<br>weekday    | In-hospital               | Adjusted                    | 1.27      | 0.96      | 1.67      |
| pancreatic<br>cancer    | Aylin et al <sup>23</sup>                 | 2005-2006           | Europe and<br>Australia      | 5063                   | 8                    | administrative<br>data | weekend vs.<br>weekday    | In-hospital               | Adjusted                    | 1.51      | 1.29      | 1.77      |
| lymphoma                | Bell et al <sup>1</sup>                   | 1988-1997           | North America                | 5880                   | 8                    | administrative<br>data | weekend vs.<br>weekday    | In-hospital               | Adjusted                    | 1.14      | 0.99      | 1.30      |
| lymphoma                | Cram et al <sup>3</sup>                   | 1998                | North America                | 1303                   | 8                    | administrative<br>data | weekend vs.<br>weekday    | In-hospital               | Adjusted                    | 1.07      | 0.82      | 1.40      |
| lymphoma                | Aylin et al <sup>23</sup>                 | 2005-2006           | Europe and<br>Australia      | 7992                   | 8                    | administrative<br>data | weekend vs.<br>weekday    | In-hospital               | Adjusted                    | 1.33      | 1.12      | 1.57      |

**Supplemental Table S1. Study Characteristics for Cohorts of Off-hour Admission and Mortality Risk (continued).**

| <b>Disease</b>            | <b>First author,<br/>publication year</b> | <b>Study period</b> | <b>Country or<br/>region</b> | <b>Sample<br/>size</b> | <b>NOS<br/>score</b> | <b>Data source</b>     | <b>Admission<br/>time</b>           | <b>Mortality<br/>type</b> | <b>Outcome<br/>Adjusted</b> | <b>OR</b> | <b>LL</b> | <b>UL</b> |
|---------------------------|-------------------------------------------|---------------------|------------------------------|------------------------|----------------------|------------------------|-------------------------------------|---------------------------|-----------------------------|-----------|-----------|-----------|
| intestinal<br>obstruction | Bell et al <sup>1</sup>                   | 1988-1997           | North America                | 43541                  | 8                    | administrative<br>data | weekend vs.<br>weekday              | In-hospital               | Adjusted                    | 1.08      | 0.96      | 1.21      |
| intestinal<br>obstruction | Cram et al <sup>3</sup>                   | 1998                | North America                | 17979                  | 8                    | administrative<br>data | weekend vs.<br>weekday              | In-hospital               | Adjusted                    | 1.14      | 0.95      | 1.35      |
| intestinal<br>obstruction | Aylin et al <sup>23</sup>                 | 2005-2006           | Europe and<br>Australia      | 17328                  | 8                    | administrative<br>data | weekend vs.<br>weekday              | In-hospital               | Adjusted                    | 1.02      | 0.90      | 1.15      |
| intestinal<br>obstruction | McVay et al <sup>140</sup>                | 2004-2011           | North America                | 404                    | 7                    | administrative<br>data | weekend and<br>night vs.<br>weekday | 30-day                    | Unadjusted                  | 1.31      | 0.26      | 6.67      |

OR= odds ratio. LL= lower limit of Confidence Interval. UL= upper limit of Confidence Interval. vs.= versus;

If OR is not given, RR or HR would be used;

Different cohorts in one study had been listed separately.

**Supplemental Data S1. List of references included in meta-analysis.**

1. Bell CM, Redelmeier DA. Mortality among patients admitted to hospitals on weekends as compared with weekdays. *N Engl J Med.* 2001;345:663-668
2. Henriques JP, Haasdijk AP, Zijlstra F. Outcome of primary angioplasty for acute myocardial infarction during routine duty hours versus during off-hours. *J Am Coll Cardiol.* 2003;41:2138-2142
3. Cram P, Hillis SL, Barnett M, Rosenthal GE. Effects of weekend admission and hospital teaching status on in-hospital mortality. *Am J Med.* 2004;117:151-157
4. Sadeghi HM, Grines CL, Chandra HR, Mehran R, Fahy M, Cox DA, Garcia E, Tchong JE, Griffin JJ, Stuckey TD, Lansky AJ, O'Neill WW, Stone GW. Magnitude and impact of treatment delays on weeknights and weekends in patients undergoing primary angioplasty for acute myocardial infarction (the cadillac trial). *Am J Cardiol.* 2004;94:637-640, A639
5. Magid D, Wang Y, Herrin J, McNamara R, Bradley E, Curtis J, Pollack C, French W, Blaney M, Krumholz H. Relationship between time of day, day of week, timeliness of reperfusion, and in-hospital mortality for patients with acute st-segment elevation myocardial infarction. *JAMA.* 2005;294:803-812
6. Assali AR, Brosh D, Vaknin-Assa H, Fuchs S, Teplitsky I, Sela O, Kornowski R. The impact of circadian variation on outcomes in emergency acute anterior myocardial infarction percutaneous coronary intervention. *Catheter Cardiovasc Interv.* 2006;67:221-226
7. Becker DJ. Do hospitals provide lower quality care on weekends? *Health Serv Res.* 2007;42:1589-1612
8. Kostis WJ, Demissie K, Marcella SW, Shao YH, Wilson AC, Moreyra AE. Weekend versus weekday admission and mortality from myocardial infarction. *N Engl J Med.* 2007;356:1099-1109
9. Ortolani P, Marzocchi A, Marrozzini C, Palmerini T, Saia F, Aquilina M, Baldazzi F, Silenzi S, Taglieri N, Grosseto D, Bacchi-Reggiani ML, Guastaroba P, Grilli R, Branzi A. Clinical comparison of "normal-hours" vs "off-hours" percutaneous coronary interventions for st-elevation myocardial infarction. *Am Heart J.* 2007;154:366-372
10. Slonka G, Gasior M, Lekston A, Gierlotka M, Hawranek M, Tajstra M, Polonski L. Comparison of results of percutaneous coronary interventions in patients with

st-segment elevation myocardial infarction during routine working hours or off-hours. *Kardiol Pol.* 2007;65:1171-1177; discussion 1178-1180

11. Srimahachota S, Boonyaratavej S, Udayachalerm W, Buddhari W, Chaipromprasit J, Suithichaiyakul T. Comparison of official hours versus non-official hours: Percutaneous coronary intervention in acute st-elevation myocardial infarction patients. *J Med Assoc Thai.* 2007;90:45-51

12. Berger A, Stauffer JC, Radovanovic D, Urban P, Bertel O, Erne P. Comparison of in-hospital mortality for acute myocardial infarction in switzerland with admission during routine duty hours versus admission during out of hours (insight into the amis plus registry). *Am J Cardiol.* 2008;101:422-427

13. Evangelista PA, Barreto SM, Guerra HL. Hospital admission and hospital death associated to ischemic heart diseases at the national health system (sus). *Arq Bras Cardiol.* 2008;90:119-126

14. Glaser R, Naidu SS, Selzer F, Jacobs AK, Laskey WK, Srinivas VS, Slater JN, Wilensky RL. Factors associated with poorer prognosis for patients undergoing primary percutaneous coronary intervention during off-hours: Biology or systems failure? *JACC Cardiovasc Interv.* 2008;1:681-688

15. Jneid H, Fonarow GC, Cannon CP, Palacios IF, Kilic T, Moukarbel GV, Maree AO, LaBresh KA, Liang L, Newby LK, Fletcher G, Wexler L, Peterson E. Impact of time of presentation on the care and outcomes of acute myocardial infarction. *Circulation.* 2008;117:2502-2509

16. Kruth P, Zeymer U, Gitt A, Junger C, Wienbergen H, Niedermeier F, Glunz HG, Senges J, Zahn R. Influence of presentation at the weekend on treatment and outcome in st-elevation myocardial infarction in hospitals with catheterization laboratories. *Clin Res Cardiol.* 2008;97:742-747

17. Becker D, Soos P, Berta B, Nagy A, Fulop G, Szabo G, Barczy G, Belicza E, Martai I, Merkely B. Significance of off-hours in centralized primary percutaneous coronary intervention network. *Croat Med J.* 2009;50:476-482

18. Cubeddu RJ, Cruz-Gonzalez I, Kiernan TJ, Truong QA, Rosenfield K, Leinbach RC, Cadigan ME, Pomerantsev EV, Palacios IF. St-elevation myocardial infarction mortality in a major academic center "on-" versus "off-" hours. *J Invasive Cardiol.* 2009;21:518-523

19. Albuquerque GOd, Szuster E, Corrêa LCT, Goulart E, Souza AC, Sobrinho ALdOA, Barbosa MdR. Análise dos resultados do atendimento ao paciente com infarto agudo

- do miocárdio com supradesnivelamento do segmento st nos períodos diurno e noturno. *Revista Brasileira de Cardiologia Invasiva*. 2009;17:52-57
20. Lairez O, Roncalli J, Carrie D, Elbaz M, Galinier M, Tauzin S, Celse D, Puel J, Fauvel JM, Ruidavets JB. Relationship between time of day, day of the week and in-hospital mortality in patients undergoing emergency percutaneous coronary intervention. *Arch Cardiovasc Dis*. 2009;102:811-820
21. Pollack CV, Jr., Hollander JE, Chen AY, Peterson ED, Bangalore S, Peacock FW, Cannon CP, Canto JG, Gibler BW, Ohman ME, Roe MT. Non-st-elevation myocardial infarction patients who present during off hours have higher risk profiles and are treated less aggressively, but their outcomes are not worse: A report from can rapid risk stratification of unstable angina patients suppress adverse outcomes with early implementation of the acc/aha guidelines crusade initiative. *Crit Pathw Cardiol*. 2009;8:29-33
22. Uyarel H, Ergelen M, Akkaya E, Ayhan E, Demirci D, Gul M, Isik T, Cicek G, Gunaydin ZY, Ugur M, Demirci DE, Turkkan C, Erer HB, Ozturk R, Yekeler I. Impact of day versus night as intervention time on the outcomes of primary angioplasty for acute myocardial infarction. *Catheter Cardiovasc Interv*. 2009;74:826-834
23. Aylin P, Yunus A, Bottle A, Majeed A, Bell D. Weekend mortality for emergency admissions. A large, multicentre study. *Qual Saf Health Care*. 2010;19:213-217
24. Cardoso CdO, Quadros ASd, Voltolini I, Azmus AD, Cardoso CR, Sebben J, Welter D, Abelin AP, Rover M, Baldissera F, Bosco M, Rodrigues D, Dutra OP, Peñalosa M, Sarmiento-Leite R, Gottschall CAM. Angioplastia primária no infarto agudo do miocárdio: Existe diferença de resultados entre as angioplastias realizadas dentro e fora do horário de rotina? *Revista Brasileira de Cardiologia Invasiva*. 2010;18:273-280
25. Clarke MS, Wills RA, Bowman RV, Zimmerman PV, Fong KM, Coory MD, Yang IA. Exploratory study of the 'weekend effect' for acute medical admissions to public hospitals in queensland, australia. *Internal Medicine Journal*. 2010;40:777-783
26. Gonzalez MA, Ben-Dor I, Wakabayashi K, Maluenda G, Gaglia MA, Jr., Hanna NN, Delhay C, Collins SD, Syed AI, Mitulescu LP, Torguson R, Suddath WO, Lindsay J, Pichard AD, Satler LF, Waksman R. Does on- versus off-hours presentation impact in-hospital outcomes of st-segment elevation myocardial infarction patients transferred to a tertiary care center? *Catheter Cardiovasc Interv*. 2010;76:484-490

27. Hong JS, Kang HC, Lee SH. Comparison of case fatality rates for acute myocardial infarction in weekday vs weekend admissions in south korea. *Circ J*. 2010;74:496-502
28. Maier B, Behrens S, Graf-Bothe C, Kuckuck H, Roehnisch JU, Schoeller RG, Schuehlen H, Theres HP. Time of admission, quality of pci care, and outcome of patients with st-elevation myocardial infarction. *Clin Res Cardiol*. 2010;99:565-572
29. Casella G, Ottani F, Ortolani P, Guastaroba P, Santarelli A, Balducelli M, Menozzi A, Magnavacchi P, Sangiorgi GM, Manari A, De Palma R, Marzocchi A. Off-hour primary percutaneous coronary angioplasty does not affect outcome of patients with st-segment elevation acute myocardial infarction treated within a regional network for reperfusion: The real (registro regionale angioplastiche dell'emilia-romagna) registry. *JACC Cardiovasc Interv*. 2011;4:270-278
30. Graham MM, Ghali WA, Southern DA, Traboulsi M, Knudtson ML. Outcomes of after-hours versus regular working hours primary percutaneous coronary intervention for acute myocardial infarction. *BMJ Qual Saf*. 2011;20:60-67
31. Siudak Z, Rakowski T, Dziewierz A, Skowronek J, Rutka J, Bagiński M, Ranoś P, Dubiel JS, Dudek D. Primary percutaneous coronary intervention during on- vs off-hours in patients with st-elevation myocardial infarction. Results from eurotransfer registry. *Kardiol Pol*. 2011;69:1017-1022
32. Al Faleh HF, Thalib L, AlHabib KF, Ullah A, AlNemer K, AlSaif SM, Taraben AN, Malik A, Abuosa AM, Mimish LA, Hersia AS. Are acute coronary syndrome patients admitted during off-duty hours treated differently? An analysis of the saudi project for assessment of acute coronary syndrome (space) study. *Ann Saudi Med*. 2012;32:366-371
33. de Boer SP, Oemrawsingh RM, Lenzen MJ, van Mieghem NM, Schultz C, Akkerhuis KM, van Leeuwen MA, Zijlstra F, van Domburg RT, Serruys PW, Boersma E. Primary pci during off-hours is not related to increased mortality. *Eur Heart J Acute Cardiovasc Care*. 2012;1:33-39
34. Hansen KW, Hvelplund A, Abildstrom SZ, Prescott E, Madsen M, Madsen JK, Jensen JS, Sorensen R, Galatius S. Prognosis and treatment in patients admitted with acute myocardial infarction on weekends and weekdays from 1997 to 2009. *Int J Cardiol*. 2013;168:1167-1173

35. Noman A, Ahmed JM, Spyridopoulos I, Bagnall A, Egred M. Mortality outcome of out-of-hours primary percutaneous coronary intervention in the current era. *Eur Heart J*. 2012;33:3046-3053
36. Cubeddu RJ, Palacios IF, Blankenship JC, Horvath SA, Xu K, Kovacic JC, Dangas GD, Witzenbichler B, Guagliumi G, Kornowski R, Dudek D, Stone GW, Mehran R. Outcome of patients with st-segment elevation myocardial infarction undergoing primary percutaneous coronary intervention during on- versus off-hours (a harmonizing outcomes with revascularization and stents in acute myocardial infarction [horizons-ami] trial substudy). *Am J Cardiol*. 2013;111:946-954
37. Gyenes GT, Yan AT, Tan M, Welsh RC, Fox KA, Grondin FR, Deyoung JP, Rose BF, Gallo R, Kornder JM, Wong GC, Goodman SG. Use and timing of coronary angiography and associated in-hospital outcomes in canadian non-st-segment elevation myocardial infarction patients: Insights from the canadian global registry of acute coronary events. *Can J Cardiol*. 2013;29:1429-1435
38. Khera S, Kolte D, Palaniswamy C, Mujib M, Aronow WS, Singh T, Gotsis W, Silverman G, Frishman WH. St-elevation myocardial infarction in the elderly--temporal trends in incidence, utilization of percutaneous coronary intervention and outcomes in the united states. *Int J Cardiol*. 2013;168:3683-3690
39. O'Neill DE, Southern DA, O'Neill BJ, McMurtry MS, Graham MM. Weekend compared with weekday presentation does not affect outcomes of patients presenting with non-st elevation acute coronary syndrome. *Eur Heart J Acute Cardiovasc Care*. 2014;3:99-104
40. Rathod KS, Jones DA, Gallagher SM, Bromage DI, Whitbread M, Archbold AR, Jain AK, Mathur A, Wragg A, Knight CJ. Out-of-hours primary percutaneous coronary intervention for st-elevation myocardial infarction is not associated with excess mortality: A study of 3347 patients treated in an integrated cardiac network. *BMJ Open*. 2013;3
41. Shavelle DM, Zheng L, Ottochian M, Wagman B, Testa N, Hall S, Koenig W, Chan LS, Matthews RV. Time of day variation in door-to-balloon time for stemi patients in los angeles county: Does time of day make a difference? *Acute Card Care*. 2013;15:52-57
42. Showkathali R, Davies JR, Sayer JW, Kelly PA, Aggarwal RK, Clesham GJ. The advantages of a consultant led primary percutaneous coronary intervention service on



patient outcome. *QJM*. 2013;106:989-994

43. Snelder SM, Nauta ST, Akkerhuis KM, Deckers JW, van Domburg RT. Weekend versus weekday mortality in st-segment elevation acute myocardial infarction patients between 1985 and 2008. *Int J Cardiol*. 2013;168:1576-1577

44. Al-Asadi JN, Kadhim FN. Day of admission and risk of myocardial infarction mortality in a cardiac care unit in basrah, iraq. *Niger J Clin Pract*. 2014;17:579-584

45. Nagrebetskyi I, Seminog O, Goldacre M. The effect of hospital admission day on mortality from myocardial infarction in england: A national record linkage study. *JACC*. 2014;63:A55

46. Sterling SA, Butler K, Summers RL, Wruck L, Kloss R, Friedrich C, Mosley T, Rosamond W, Jones AE. The effect of admission time on longterm mortality in patients with acute myocardial infarction: The atherosclerosis risk in communities study. *Acad Emerg Med*. 2014;21:S132

47. Sorita A, Lennon RJ, Haydour Q, Ahmed A, Bell MR, Rihal CS, Gersh BJ, Holmen JL, Shah ND, Murad MH, Ting HH. Off-hour admission and outcomes for patients with acute myocardial infarction undergoing percutaneous coronary interventions. *Am Heart J*. 2015;169:62-68

48. Isogai T, Yasunaga H, Matsui H, Tanaka H, Ueda T, Horiguchi H, Fushimi K. Effect of weekend admission for acute myocardial infarction on in-hospital mortality: A retrospective cohort study. *Int J Cardiol*. 2015;179:315-320

49. Hasegawa Y, Yoneda Y, Okuda S, Hamada R, Toyota A, Gotoh J, Watanabe M, Okada Y, Ikeda K, Ibayashi S. The effect of weekends and holidays on stroke outcome in acute stroke units. *Cerebrovasc Dis*. 2005;20:325-331

50. Schmulewitz L, Proudfoot A, Bell D. The impact of weekends on outcome for emergency patients. *Clin Med*. 2005;5:621-625

51. Saposnik G, Baibergenova A, Bayer N, Hachinski V. Weekends: A dangerous time for having a stroke? *Stroke*. 2007;38:1211-1215

52. Turin TC, Kita Y, Rumana N, Ichikawa M, Sugihara H, Morita Y, Tomioka N, Okayama A, Nakamura Y, Ueshima H. Case fatality of stroke and day of the week: Is the

- weekend effect an artifact? Takashima stroke registry, japan (1988-2003). *Cerebrovasc Dis*. 2008;26:606-611
53. Jauss M, Oertel W, Allendoerfer J, Misselwitz B, Hamer H. Bias in request for medical care and impact on outcome during office and non-office hours in stroke patients. *Eur J Neurol*. 2009;16:1165-1167
54. Reeves MJ, Smith E, Fonarow G, Hernandez A, Pan W, Schwamm LH. Off-hour admission and in-hospital stroke case fatality in the get with the guidelines-stroke program. *Stroke*. 2009;40:569-576
55. Tung YC, Chang GM, Chen YH. Associations of physician volume and weekend admissions with ischemic stroke outcome in taiwan: A nationwide population-based study. *Med Care*. 2009;47:1018-1025
56. Fang J, Saposnik G, Silver FL, Kapral MK. Association between weekend hospital presentation and stroke fatality. *Neurology*. 2010;75:1589-1596
57. Hoh BL, Chi YY, Waters MF, Mocco J, Barker FG, 2nd. Effect of weekend compared with weekday stroke admission on thrombolytic use, in-hospital mortality, discharge disposition, hospital charges, and length of stay in the nationwide inpatient sample database, 2002 to 2007. *Stroke*. 2010;41:2323-2328
58. Kazley AS, Hillman DG, Johnston KC, Simpson KN. Hospital care for patients experiencing weekend vs weekday stroke: A comparison of quality and aggressiveness of care. *Arch Neurol*. 2010;67:39-44
59. McKinney JS, Deng Y, Kasner SE, Kostis JB. Comprehensive stroke centers overcome the weekend versus weekday gap in stroke treatment and mortality. *Stroke*. 2011;42:2403-2409
60. Ogbu UC, Westert GP, Slobbe LC, Stronks K, Arah OA. A multifaceted look at time of admission and its impact on case-fatality among a cohort of ischaemic stroke patients. *J Neurol Neurosurg Psychiatry*. 2011;82:8-13
61. Albright KC, Savitz SI, Raman R, Martin-Schild S, Broderick J, Ernstrom K, Ford A, Khatri R, Kleindorfer D, Liebeskind D, Marshall R, Merino JG, Meyer DM, Rost N, Meyer BC. Comprehensive stroke centers and the 'weekend effect': The spotrias experience. *Cerebrovasc Dis*. 2012;34:424-429

62. Madej-Fermo OP, Staff I, Fortunato G, Abbott L, McCullough LD. Impact of emergency department transitions of care on thrombolytic use in acute ischemic stroke. *Stroke*. 2012;43:1067-1074
63. Martinez-Martinez MM, Fernandez-Travieso J, Fuentes B, Ruiz-Ares G, Martinez-Sanchez P, Cazorla Garcia R, Rodriguez de Antonio LA, Alonso-Singer P, Oliva-Navarro J, Diez-Tejedor E. Off-hour effects on stroke care and outcome in stroke centres. *Eur J Neurol*. 2012;19:1140-1145
64. Niewada M, Jezierska-Ostapczuk A, Skowronska M, Sarzynska-Dlugosz I, Czlonkowska A. Weekend versus weekday admissions in polish stroke centres -- could admission day affect prognosis in polish ischaemic stroke patients? *Neurol Neurochir Pol*. 2012;46:15-21
65. Palmer WL, Bottle A, Davie C, Vincent CA, Aylin P. Dying for the weekend: A retrospective cohort study on the association between day of hospital presentation and the quality and safety of stroke care. *Arch Neurol*. 2012;69:1296-1302
66. Streifler JY, Benderly M, Molshatzki N, Bornstein N, Tanne D. Off-hours admission for acute stroke is not associated with worse outcome--a nationwide israeli stroke project. *Eur J Neurol*. 2012;19:643-647
67. Barros JB, Goulart AC, Alencar AP, Lotufo PA, Bensenor IM. The influence of the day of the week of hospital admission on the prognosis of stroke patients. *Cad Saude Publica*. 2013;29:769-777
68. Bejot Y, Aboa-Eboule C, Jacquin A, Troisgros O, Hervieu M, Durier J, Osseby GV, Giroud M. Stroke care organization overcomes the deleterious 'weekend effect' on 1-month stroke mortality: A population-based study. *Eur J Neurol*. 2013;20:1177-1183
69. Concha OP, Gallego B, Hillman K, Delaney GP, Coiera E. Do variations in hospital mortality patterns after weekend admission reflect reduced quality of care or different patient cohorts? A population-based study. *BMJ Qual Saf*. 2014;23:215-222
70. Lee J, Morishima T, Kunisawa S, Sasaki N, Otsubo T, Ikai H, Imanaka Y. Derivation and validation of in-hospital mortality prediction models in ischaemic stroke patients using administrative data. *Cerebrovasc Dis*. 2013;35:73-80

71. Nishimura K, Iihara K, Kada A, Nakai M, Nakagawara J, Ogasawara KO, Ono J, Shiokawa Y, Aruga T, Miyachi S, Nagata I, Kamitani S, Toyoda K, Mori H, Kataoka H, Matsuda S. Stroke mortality in japan increases on weekends although those in comprehensive stroke centers remain unchanged.-j-aspect study. *Stroke*. 2013;44
72. Bray BD, Ayis S, Campbell J, Cloud GC, James M, Hoffman A, Tyrrell PJ, Wolfe CD, Rudd AG. Associations between stroke mortality and weekend working by stroke specialist physicians and registered nurses: Prospective multicentre cohort study. *PLoS Med*. 2014;11:e1001705
73. Kamitani S, Nishimura K, Nakamura F, Kada A, Nakagawara J, Toyoda K, Ogasawara K, Ono J, Shiokawa Y, Aruga T, Miyachi S, Nagata I, Matsuda S, Miyamoto Y, Iwata M, Suzuki A, Ishikawa KB, Kataoka H, Morita K, Kobayashi Y, Iihara K. Consciousness level and off-hour admission affect discharge outcome of acute stroke patients: A j-aspect study. *J Am Heart Assoc*. 2014;3:e001059
74. Lusic I, Cizmic M. In-hospital mortality among stroke patients admitted to hospital on weekends as compared to weekdays. *European Journal of Neurology*. 2014;21:480
75. O'Brien EC, Rose KM, Shahar E, Rosamond WD. Stroke mortality, clinical presentation and day of arrival: The atherosclerosis risk in communities (aric) study. *Stroke Res Treat*. 2011;2011:383012
76. Aujesky D, Jiménez D, Mor M, Geng M, Fine M, Ibrahim S. Weekend versus weekday admission and mortality after acute pulmonary embolism. *Circulation*. 2009;119:962-968
77. Gallerani M, Imberti D, Ageno W, Dentali F, Manfredini R. Higher mortality rate in patients hospitalised for acute pulmonary embolism during weekends. *Thromb Haemost*. 2011;106:83-89
78. Nanchal R, Kumar G, Taneja A, Patel J, Deshmukh A, Tarima S, Jacobs ER, Whittle J. Pulmonary embolism: The weekend effect. *Chest*. 2012;142:690-696
79. Giri S, Pathak R, Aryal MR, Karmacharya P, Bhatt VR, Martin MG. Lack of "weekend effect" on mortality for pulmonary embolism admissions in 2011: Data from nationwide inpatient sample. *Int J Cardiol*. 2015;180:151-153

80. James MT, Wald R, Bell CM, Tonelli M, Hemmelgarn BR, Waikar SS, Chertow GM. Weekend hospital admission, acute kidney injury, and mortality. *J Am Soc Nephrol.* 2010;21:845-851
81. Sakhuja A, Schold JD, Kumar G, Dall A, Sood P, Navaneethan SD. Outcomes of patients receiving maintenance dialysis admitted over weekends. *Am J Kidney Dis.* 2013;62:763-770
82. Fonarow GC, Abraham WT, Albert NM, Stough WG, Gheorghiu M, Greenberg BH, O'Connor CM, Nunez E, Yancy CW, Young JB. Day of admission and clinical outcomes for patients hospitalized for heart failure: Findings from the organized program to initiate lifesaving treatment in hospitalized patients with heart failure (optimize-hf). *Circ Heart Fail.* 2008;1:50-57
83. Gallerani M, Boari B, Manfredini F, Mari E, Maraldi C, Manfredini R. Weekend versus weekday acute hospital admissions for heart failure. *Int J Cardiol.* 2011;148:119
84. Horwich TB, Hernandez AF, Liang L, Albert NM, Labresh KA, Yancy CW, Fonarow GC. Weekend hospital admission and discharge for heart failure: Association with quality of care and clinical outcomes. *Am Heart J.* 2009;158:451-458
85. Hamaguchi S, Kinugawa S, Tsuchihashi-Makaya M, Goto D, Tsutsui H. Weekend versus weekday hospital admission and outcomes during hospitalization for patients due to worsening heart failure: A report from Japanese cardiac registry of heart failure in cardiology (jcare-card). *Heart Vessels.* 2014;29:328-335
86. Sprung J, Warner ME, Contreras MG, Schroeder DR, Beighley CM, Wilson GA, Warner DO. Predictors of survival following cardiac arrest in patients undergoing noncardiac surgery: A study of 518,294 patients at a tertiary referral center. *Anesthesiology.* 2003;99:259-269
87. Peberdy M, Ornato J, Larkin G, Braithwaite R, Kashner T, Carey S, Meaney P, Cen L, Nadkarni V, Praetgaard A, Berg R. Survival from in-hospital cardiac arrest during nights and weekends. *JAMA.* 2008;299:785-792
88. Koike S, Tanabe S, Ogawa T, Akahane M, Yasunaga H, Horiguchi H, Matsumoto S, Imamura T. Effect of time and day of admission on 1-month survival and neurologically favourable 1-month survival in out-of-hospital cardiopulmonary arrest patients. *Resuscitation.* 2011;82:863-868

89. Moler FW, Donaldson AE, Meert K, Brilli RJ, Nadkarni V, Shaffner DH, Schleien CL, Clark RS, Dalton HJ, Statler K, Tieves KS, Hackbarth R, Pretzlaff R, van der Jagt EW, Pineda J, Hernan L, Dean JM. Multicenter cohort study of out-of-hospital pediatric cardiac arrest. *Crit Care Med.* 2011;39:141-149
90. Qureshi SA, Ahern T, O'Shea R, Hatch L, Henderson SO. A standardized code blue team eliminates variable survival from in-hospital cardiac arrest. *J Emerg Med.* 2012;42:74-78
91. Crowley RW, Yeoh HK, Stukenborg GJ, Medel R, Kassell NF, Dumont AS. Influence of weekend hospital admission on short-term mortality after intracerebral hemorrhage. *Stroke.* 2009;40:2387-2392
92. Busl KM, Prabhakaran S. Predictors of mortality in nontraumatic subdural hematoma. *J Neurosurg.* 2013;119:1296-1301
93. Jiang F, Zhang JH, Qin X. "Weekend effects" in patients with intracerebral hemorrhage. *Acta Neurochir Suppl.* 2011;111:333-336
94. McDowell MM, Kellner CP, Sussman ES, Bruce SS, Bruce RA, Heuts SG, Sander Connolly E. The role of admission timing in the outcome of intracerebral hemorrhage patients at a specialized stroke center. *Neurol Res.* 2014;36:95-101
95. Ananthakrishnan AN, McGinley EL, Saeian K. Outcomes of weekend admissions for upper gastrointestinal hemorrhage: A nationwide analysis. *Clin Gastroenterol Hepatol.* 2009;7:296-302e291
96. Dorn SD, Shah ND, Berg BP, Naessens JM. Effect of weekend hospital admission on gastrointestinal hemorrhage outcomes. *Dig Dis Sci.* 2010;55:1658-1666
97. Myers R, Kaplan G, Shaheen A. The effect of weekend versus weekday admission on outcomes of esophageal variceal hemorrhage. *Can. J. Gastroenterol.* 2009;23:495-501
98. Shaheen AA, Kaplan GG, Myers RP. Weekend versus weekday admission and mortality from gastrointestinal hemorrhage caused by peptic ulcer disease. *Clin Gastroenterol Hepatol.* 2009;7:303-310
99. Button LA, Roberts SE, Evans PA, Goldacre MJ, Akbari A, Dsilva R, Macey S, Williams JG. Hospitalized incidence and case fatality for upper gastrointestinal bleeding

from 1999 to 2007: A record linkage study. *Aliment Pharmacol Ther.* 2011;33:64-76

100. Nahon S, Pariente A, Pauwels A, Boruchowicz A. Influence of weekend versus weekday admissions on the prognosis of upper gastrointestinal bleeding caused by portal hypertension: Post hoc analysis of a prospective study. *J Clin Gastroenterol.* 2010;44:228-229

101. Jairath V, Kahan BC, Logan RF, Hearnshaw SA, Travis SP, Murphy MF, Palmer KR. Mortality from acute upper gastrointestinal bleeding in the united kingdom: Does it display a "weekend effect"? *Am J Gastroenterol.* 2011;106:1621-1628

102. Byun SJ, Kim SU, Park JY, Kim BK, Kim do Y, Han KH, Chon CY, Ahn SH. Acute variceal hemorrhage in patients with liver cirrhosis: Weekend versus weekday admissions. *Yonsei Med J.* 2012;53:318-327

103. de Groot NL, Bosman JH, Siersema PD, van Oijen MG, Bredenoord AJ. Admission time is associated with outcome of upper gastrointestinal bleeding: Results of a multicentre prospective cohort study. *Aliment Pharmacol Ther.* 2012;36:477-484

104. Abougergi MS, Travis AC, Saltzman JR. Impact of day of admission on mortality and other outcomes in upper gi hemorrhage: A nationwide analysis. *Gastrointest Endosc.* 2014;80:228-235

105. Tufegdzic M, Panic N, Boccia S, Malerba S, Bulajic M, La Vecchia C, Sljivic A, Trbojevic-Stankovic J, Krstic M. The weekend effect in patients hospitalized for upper gastrointestinal bleeding: A single-center 10-year experience. *Eur J Gastroenterol Hepatol.* 2014;26:715-720

106. Wu TC, Chuah SK, Chang KC, Wu CK, Kuo CH, Wu KL, Chiu YC, Hu TH, Tai WC. Outcome of holiday and nonholiday admission patients with acute peptic ulcer bleeding: A real-world report from southern taiwan. *Biomed Res Int.* 2014;2014:906531

107. Gallerani M, Imberti D, Bossone E, Eagle KA, Manfredini R. Higher mortality in patients hospitalized for acute aortic rupture or dissection during weekends. *J Vasc Surg.* 2012;55:1247-1254

108. Gallerani M, Volpato S, Boari B, Pala M, De Giorgi A, Fabbian F, Gasbarro V, Bossone E, Eagle KA, Carle F, Manfredini R. Outcomes of weekend versus weekday

- admission for acute aortic dissection or rupture: A retrospective study on the italian national hospital database. *Int J Cardiol.* 2013;168:3117-3119
109. Groves EM, Khoshchereh M, Le C, Malik S. Effects of weekend admission on the outcomes and management of ruptured aortic aneurysms. *J Vasc Surg.* 2014;60:318-324
110. Brims FJ, Asiimwe A, Andrews NP, Prytherch D, Higgins BR, Kilburn S, Chauhan AJ. Weekend admission and mortality from acute exacerbations of chronic obstructive pulmonary disease in winter. *Clin Med.* 2011;11:334-339
111. Barba R, Zapatero A, Losa JE, Marco J, Plaza S, Rosado C, Canora J. The impact of weekends on outcome for acute exacerbations of COPD. *Eur Respir J.* 2012;39:46-50
112. Suissa S, Dell'Aniello S, Suissa D, Ernst P. Friday and weekend hospital stays: Effects on mortality. *Eur Respir J.* 2014;44:627-633
113. Goodman EK, Reilly AF, Fisher BT, Fitzgerald J, Li Y, Seif AE, Huang YS, Bagatell R, Aplenc R. Association of weekend admission with hospital length of stay, time to chemotherapy, and risk for respiratory failure in pediatric patients with newly diagnosed leukemia at freestanding us children's hospitals. *JAMA Pediatr.* 2014;168:925-931
114. Gould J, Qin C, Marks A, Chavez G. Neonatal mortality in weekend vs weekday births. *JAMA.* 2003;289:2958-2962
115. Hamilton P, Restrepo E. Weekend birth and higher neonatal mortality: A problem of patient acuity or quality of care? *J Obstet Gynecol Neonatal Nurs.* 2003;32:724-733
116. Stephansson O, Dickman PW, Johansson AL, Kieler H, Cnattingius S. Time of birth and risk of intrapartum and early neonatal death. *Epidemiology.* 2003;14:218-222
117. Luo ZC, Liu S, Wilkins R, Kramer MS. Risks of stillbirth and early neonatal death by day of week. *CMAJ.* 2004;170:337-341
118. Bell EF, Hansen NI, Morriss FH, Jr., Stoll BJ, Ambalavanan N, Gould JB, Lupton AR, Walsh MC, Carlo WA, Shankaran S, Das A, Higgins RD. Impact of timing of birth and resident duty-hour restrictions on outcomes for small preterm infants. *Pediatrics.* 2010;126:222-231
119. Gijzen R, Hukkelhoven CW, Schipper CM, Ogbu UC, de Bruin-Kooistra M, Westert GP. Effects of hospital delivery during off-hours on perinatal outcome in several subgroups: A retrospective cohort study. *BMC Pregnancy Childbirth.* 2012;12:92



120. Ibrahimou B, Salihu HM, English G, Anozie C, Lartey G, Dagne G. Twins born over weekends: Are they at risk for elevated infant mortality? *Arch Gynecol Obstet.* 2012;286:1349-1355
121. Salihu HM, Ibrahimou B, August EM, Dagne G. Risk of infant mortality with weekend versus weekday births: A population-based study. *J Obstet Gynaecol Res.* 2012;38:973-979
122. Chang GM, Tung YC. Factors associated with pneumonia outcomes: A nationwide population-based study over the 1997-2008 period. *J Gen Intern Med.* 2012;27:527-533
123. Gathara D, Irimu G, Kihara H, Maina C, Mbori-Ngacha D, Mwangi J, Allen E, English M. Hospital outcomes for paediatric pneumonia and diarrhoea patients admitted in a tertiary hospital on weekdays versus weekends: A retrospective study. *BMC Pediatr.* 2013;13:74
124. Foss NB, Kehlet H. Short-term mortality in hip fracture patients admitted during weekends and holidays. *Br J Anaesth.* 2006;96:450-454
125. Daugaard CL, Jorgensen HL, Riis T, Lauritzen JB, Duus BR, van der Mark S. Is mortality after hip fracture associated with surgical delay or admission during weekends and public holidays? A retrospective study of 38,020 patients. *Acta Orthop.* 2012;83:609-613
126. Thomas CJ, Smith RP, Uzoigwe CE, Braybrooke JR. The weekend effect: Short-term mortality following admission with a hip fracture. *Bone Joint J.* 2014;96-B:373-378
127. Laupland KB, Ball CG, Kirkpatrick AW. Hospital mortality among major trauma victims admitted on weekends and evenings: A cohort study. *J Trauma Manag Outcomes.* 2009;3:8
128. Carr BG, Jenkins P, Branas CC, Wiebe DJ, Kim P, Schwab CW, Reilly PM. Does the trauma system protect against the weekend effect? *J Trauma.* 2010;69:1042-1047; discussion 1047-1048
129. Carr BG, Reilly PM, Schwab CW, Branas CC, Geiger J, Wiebe DJ. Weekend and night outcomes in a statewide trauma system. *Arch Surg.* 2011;146:810-817

130. Di Bartolomeo S, Marino M, Ventura C, Trombetti S, De Palma R. A population based study on the night-time effect in trauma care. *Emerg Med J*. 2014;31:808-812
131. Arbabi S, Jurkovich GJ, Wahl WL, Kim HM, Maier RV. Effect of patient load on trauma outcomes in a level i trauma center. *J Trauma*. 2005;59:815-818; discussion 819-820
132. Crowley RW, Yeoh HK, Stukenborg GJ, Ionescu AA, Kassell NF, Dumont AS. Influence of weekend versus weekday hospital admission on mortality following subarachnoid hemorrhage. Clinical article. *J Neurosurg*. 2009;111:60-66
133. Zhang G, Zhang JH, Qin X. Effect of weekend admission on in-hospital mortality after subarachnoid hemorrhage in chongqing China. *Acta Neurochir Suppl*. 2011;110:229-232
134. Powell ES, Khare RK, Courtney DM, Feinglass J. The weekend effect for patients with sepsis presenting to the emergency department. *J Emerg Med*. 2013;45:641-648
135. Laupland KB. Admission to hospital with community-onset bloodstream infection during the 'after hours' is not associated with an increased risk for death. *Scand J Infect Dis*. 2010;42:862-865
136. Laupland KB, Kibsey PC, Galbraith JC. Community-onset bloodstream infection during the 'after hours' is not associated with an increased risk for death. *Can J Infect Dis Med Microbiol*. 2012;23:170-172
137. Schneider EB, Hirani SA, Hambridge HL, Haut ER, Carlini AR, Castillo RC, Efron DT, Haider AH. Beating the weekend trend: Increased mortality in older adult traumatic brain injury (tbi) patients admitted on weekends. *J Surg Res*. 2012;177:295-300
138. Schmid M, Ghani KR, Choueiri TK, Sood A, Kapoor V, Abdollah F, Chun FK, Leow JJ, Olugbade K, Jr., Sammon JD, Menon M, Kibel AS, Fisch M, Nguyen PL, Trinh QD. An evaluation of the 'weekend effect' in patients admitted with metastatic prostate cancer. *BJU Int*. 2014
139. Worni M, Schudel IM, Ostbye T, Shah A, Khare A, Pietrobon R, Thacker JK, Guller U. Worse outcomes in patients undergoing urgent surgery for left-sided diverticulitis

admitted on weekends vs weekdays: A population-based study of 31 832 patients. *Arch Surg.* 2012;147:649-655

140. McVay DP, Walker AS, Nelson DW, Porta CR, Causey MW, Brown TA. The weekend effect: Does time of admission impact management and outcomes of small bowel obstruction? *Gastroenterol Rep (Oxf).* 2014;2:221-22
